1

2 **The Shu Complex Prevents Mutagenesis and Cytotoxicity of Single-Strand Specific**  
3 **Alkylation Lesions**

4

5 Braulio Bonilla<sup>1</sup>, Alexander J. Brown<sup>2</sup>, Sarah R. Hengel<sup>1</sup>, Kyle S. Rapchak<sup>1</sup>, Debra Mitchell<sup>2</sup>,  
6 Catherine A. Pressimone<sup>1</sup>, Adeola A. Fagunloye<sup>1</sup>, Thong T. Luong<sup>1</sup>, Hani S. Zaher<sup>3</sup>, Nima  
7 Mosammaparast<sup>4</sup>, Ewa P. Malc<sup>5</sup>, Piotr A. Mieczkowski<sup>5</sup>, Steven A. Roberts<sup>2,#</sup>, Kara A.  
8 Bernstein<sup>1,#</sup>

9

10 <sup>1</sup>University of Pittsburgh, School of Medicine, Department of Pharmacology and Chemical  
11 Biology, Pittsburgh, PA 15213, USA.

12 <sup>2</sup>Washington State University, School of Molecular Biosciences and Center for Reproductive  
13 Biology, College of Veterinary Medicine, Pullman, WA 99164, USA.

14 <sup>3</sup>Washington University in St. Louis, Department of Biology, St. Louis, MO 63130, USA

15 <sup>4</sup>Washington University in St. Louis, Department of Pathology and Immunology, St Louis, MO  
16 63110, United States of America.

17 <sup>5</sup>Department of Genetics, Lineberger Comprehensive Cancer Center, University of North  
18 Carolina, Chapel Hill, NC 27599, USA.

19 #Corresponding authors:

20 Kara A. Bernstein, [karab@pitt.edu](mailto:karab@pitt.edu)

21 Steven A. Roberts, [steven.roberts2@wsu.edu](mailto:steven.roberts2@wsu.edu)

## 22 **ABSTRACT**

23 Three-methyl cytosine (3meC) are toxic DNA lesions, blocking base pairing. Bacteria and  
24 humans, express members of the AlkB enzymes family, which directly remove 3meC. However,  
25 other organisms, including budding yeast, lack this class of enzymes. It remains an unanswered  
26 evolutionary question as to how yeast repairs 3meC, particularly in single-stranded DNA. The  
27 yeast Shu complex, a conserved homologous recombination factor, aids in preventing  
28 replication-associated mutagenesis from DNA base damaging agents such as methyl  
29 methanesulfonate (MMS). We found that MMS-treated Shu complex-deficient cells, exhibit a  
30 genome-wide increase in A:T and G:C substitutions mutations. The G:C substitutions displayed  
31 transcriptional and replicational asymmetries consistent with mutations resulting from 3meC.  
32 Ectopic expression of a human AlkB homolog in Shu-deficient yeast rescues MMS-induced  
33 growth defects and increased mutagenesis. Finally, the Shu complex exhibits increased affinity  
34 for 3meC-containing DNA. Thus, our work identifies a novel mechanism for coping with  
35 alkylation adducts.

36

## 37 **INTRODUCTION**

38 Alkylating agents such as methyl methanesulfonate (MMS) induce a diverse set of base lesions  
39 that are recognized and repaired by the base excision repair (BER) pathway or direct repair  
40 enzymes such as the AlkB family (Fu, Calvo et al., 2012, Yi & He, 2013). However, when these  
41 lesions, or its repair intermediates, are encountered by a replisome, replication fork stalling can  
42 occur (Shrivastav, Li et al., 2010, Sobol, Kartalou et al., 2003). In this scenario, DNA base  
43 damage is preferentially bypassed using homologous recombination (HR) or translesion  
44 synthesis (TLS), postponing its repair but allowing replication to be completed in a timely

45 fashion. These pathways are often referred to as post-replication repair (PRR) or DNA damage  
46 tolerance (DDT) and are best described in the budding yeast *Saccharomyces cerevisiae* (Arbel,  
47 Liefshitz et al., 2020, Boiteux & Jinks-Robertson, 2013, Ulrich, 2007).

48 In yeast, HR-mediated PRR is an error-free pathway and is dependent on the  
49 polyubiquitination of PCNA by the Mms2-Rad5-Ubc13 complex (Arbel et al., 2020). Lesion  
50 bypass is achieved by Rad51 filament formation, and recombination between sister chromatids to  
51 fill the single-stranded DNA (ssDNA) gaps originated from the stalling of replicative  
52 polymerases. While HR can bypass these lesions in an error-free manner, TLS can also bypass  
53 this damage. However, TLS may lead to mutations and is often referred as error-prone lesion  
54 bypass. In yeast, TLS serves as an alternative pathway to error-free lesion bypass, as disruption  
55 of genes involved in the error-free PRR pathway leads to increased mutations that is dependent  
56 on TLS (Broomfield, Chow et al., 1998, Huang, Rio et al., 2003, Swanson, Morey et al., 1999).

57 The study of the error-free PRR pathway is challenging due to the diverse roles of HR  
58 proteins in additional processes, such as DSB repair. The Shu complex is an evolutionarily  
59 conserved HR factor that we recently discovered to function in strand-specific DNA damage  
60 tolerance during replication and thus provides an excellent model to specifically study HR  
61 proteins in the context of PRR (Godin, Meslin et al., 2015, Godin, Sullivan et al., 2016b, Martino  
62 & Bernstein, 2016, Rosenbaum, Bonilla et al., 2019). In *S. cerevisiae*, the Shu complex is a  
63 heterotetramer formed by the SWIM domain-containing protein, Shu2, and the Rad51 paralogs,  
64 Csm2, Psy3, and Shu1. The Shu complex promotes Rad51 filament formation, a key step for HR  
65 (Godin et al., 2016b). Consistent with their role in DSB repair, most HR genes deletions lead to  
66 increased sensitivity to DSB-inducing agents. However, this is not the case with the Shu  
67 complex, as its mutants are primarily sensitive to the alkylating agent MMS, but not to the DSB

68 inducing agents such as ionizing radiation (Godin, Zhang et al., 2016c, Shor, Weinstein et al.,  
69 2005). This makes the Shu complex attractive to dissect the role of HR in the tolerance of  
70 replication-associated DNA damage.

71 Previous studies from our group and others demonstrated that the Shu complex operates  
72 in the error-free branch of the PRR to tolerate DNA damage from MMS-induced lesions (Ball,  
73 Zhang et al., 2009, Godin, Wier et al., 2013). Despite these findings, it has remained unknown  
74 which MMS-induced lesions, or repair intermediates, the Shu complex is important for. Our  
75 previous results uncovered genetic interactions between factors of the BER pathway and the Shu  
76 complex upon MMS treatment (Godin et al., 2016c). Notably, cells lacking the BER abasic (AP)  
77 endonucleases and AP lyases that process AP sites exhibit exquisite sensitivity towards  
78 alkylating agents and display a three order of magnitude increase in mutations rates when the  
79 Shu complex is disrupted. We recently demonstrated that the Shu complex is important for  
80 tolerance of AP sites (Rosenbaum et al., 2019). However, it remains outstanding question as to  
81 whether the Shu complex may recognize other MMS-induced fork blocking lesions.

82 Here, we addressed whether the Shu complex function is specific for AP sites or if it is  
83 important for recognition of a broader range of DNA lesions. To do this, we performed whole  
84 genome sequencing of Shu mutant cells (i.e. *csm2Δ*) that had been chronically exposed to MMS.  
85 In turn, this allowed us to obtain an unbiased spectrum of mutations the Shu complex helps to  
86 mitigate. We determined that the Shu complex prevents mutations at both A:T and C:G base  
87 pairs. However, transcriptional and replicative asymmetries in C:G mutations suggest a novel  
88 role for the Shu complex in the tolerance of 3meC, in addition to AP sites. Importantly, unlike  
89 bacteria and human cells that have an enzyme that directly repairs 3meC, this family of enzymes  
90 is absent in *S. cerevisiae* and therefore it has remained unknown how 3meC are repaired in yeast

91 (Sedgwick, Bates et al., 2007). Our data suggest that the Shu complex is important for 3meC  
92 tolerance. Indeed, expression of human *ALKBH2*, responsible for 3meC repair, specifically  
93 rescues the MMS-sensitivity of Shu-complex mutant cells and alleviates their MMS-induced  
94 mutagenesis. In contrast to Shu complex mutants, we observe that *ALKBH2* expression very  
95 weakly rescues the MMS sensitivity associated with HR deletion strains. Finally, we find that the  
96 Shu complex DNA-binding subunits, Csm2-Psy3, have higher affinity for double-flap substrates  
97 containing 3meC relative to an unmodified substrate. Altogether, our findings reveal a previously  
98 unappreciated role for the Shu complex in mediating damage tolerance of 3meC in single-  
99 stranded DNA, finally uncovering how yeast tolerate these highly toxic lesions. Additionally, the  
100 ability of the Shu complex to facilitate tolerance of 3meC DNA damage through homology-  
101 directly bypass likely highlights an important repair pathway for these lesions even in organisms  
102 that express AlkB homologs.

103

## 104 **RESULTS**

### 105 **Unbiased genome-wide analysis of mutation patterns suggests that the Shu complex** 106 **function in the error-free bypass of specific MMS-induced lesions**

107 To determine the identity of MMS-induced lesions that the Shu complex helps the  
108 replication fork to bypass, we chronically exposed Shu complex-deficient cells to MMS. In  
109 particular, wild-type (WT) or *csm2Δ* cells were plated on MMS-containing medium and then  
110 individual colonies were transferred every two days onto fresh medium containing 0.008%  
111 MMS, for a total of ten passages. We then extracted genomic DNA from these colonies and  
112 performed whole-genome sequencing to measure mutation frequencies. Consistent with previous

113 findings, *csm2Δ* cells accumulated a median 12.7-fold more mutations than WT upon MMS  
114 treatment (**Figure 1A**) (Godin et al., 2013, Godin et al., 2016c). To infer which DNA lesions  
115 caused the mutations, we analyzed the substitution patterns considering the MMS-induced lesion  
116 profile (Beranek, 1990, Sikora, Mielecki et al., 2010, Wyatt & Pittman, 2006). 3meA is the most  
117 common MMS-induced lesion at A:T base pairs in dsDNA and can itself be mutagenic or  
118 converted to a mutagenic AP site by the Mag1 glycosylase or by spontaneous depurination  
119 (**Figure 1B and 1C**) (Shrivastav et al., 2010). When these AP sites are encountered by a  
120 replicative polymerase, they can lead to its stalling. TLS activity on 3meA-derived AP sites leads  
121 to an A->G and A->T substitution pattern (**Figure 1C**) due to the tendency of Rev1 or the  
122 replicative polymerase  $\delta$  incorporating a C or A on AP sites, respectively (**Figure 1C**) (Chan,  
123 Resnick et al., 2013, Haracska, Unk et al., 2001, Hoopes, Hughes et al., 2017). Consequently,  
124 most substitutions at A:T bases in MMS-treated WT yeast A to G and A to T (**Figure 1B**).  
125 Previous analyses of MMS-treated *mag1Δ* yeast revealed that deletion of the glycosylase  
126 responsible for initiating base excision repair of 3meA resulted in a mutation spectrum also  
127 predominantly composed of A to G and A to T substitutions (Mao, Brown et al., 2017),  
128 indicating that these two mutation types are likely directly induced by 3meA as opposed to  
129 3meA-derived AP sites. MMS-treated *csm2Δ* cells (**Figure 1B**) displayed elevated A->G  
130 transitions and A->T transversions, consistent with a function for the Shu complex in the bypass  
131 of 3meA or 3meA-derived AP sites, as we recently demonstrated (Godin et al., 2016c,  
132 Rosenbaum et al., 2019).

133 7meG is the most common MMS-induced DNA adduct at G:C base pairs and is not itself  
134 mutagenic (Shrivastav et al., 2010). However, it is eliminated by spontaneous depurination, or  
135 Mag1 excision, which both lead to AP sites (Bjoras, Klungland et al., 1995, Shrivastav et al.,

136 2010, Wyatt, Allan et al., 1999). When AP sites are generated from guanines, their bypass by  
137 Rev1 is error-free because it incorporates a C across the missing base. Alternatively, bypass by  
138 the replicative polymerase results in the incorporation of A across the missing base, which leads  
139 to a G to T transversion (**Figure S1**). Interestingly, the MMS-induced mutation profile at G:C  
140 base pairs in WT yeast, not only includes G->T mutations but also high levels of G->A and G-  
141 >C mutations (**Figure 1D**), suggesting that 7meG-derived AP sites are unlikely to cause these  
142 mutations. Deletion of *CSM2* results in a similar spectrum of MMS-induced G:C substitutions  
143 compared to that observed in WT yeast, but at elevated frequency, indicating that the Shu  
144 complex mediates tolerance of the same MMS-induced lesion that contributes to G:C base pair  
145 mutagenesis in WT cells, possibly N3-methylcytosine (3meC). 3meC is a mutagenic DNA  
146 adduct predominantly induced by MMS at ssDNA and can block the replicative polymerase  
147 (Shrivastav et al., 2010). Rev3-mediated TLS bypass of 3meC leads to the incorporation of a  
148 random nucleotide across the lesion, leading to a mutational pattern consistent with the one we  
149 observed in WT and *csm2Δ* yeast (**Figure 1E**) (Saini, Sterling et al., 2020, Yang, Gordenin et al.,  
150 2010), indicating that the Shu complex may also bypass this ssDNA specific alkylation lesion.

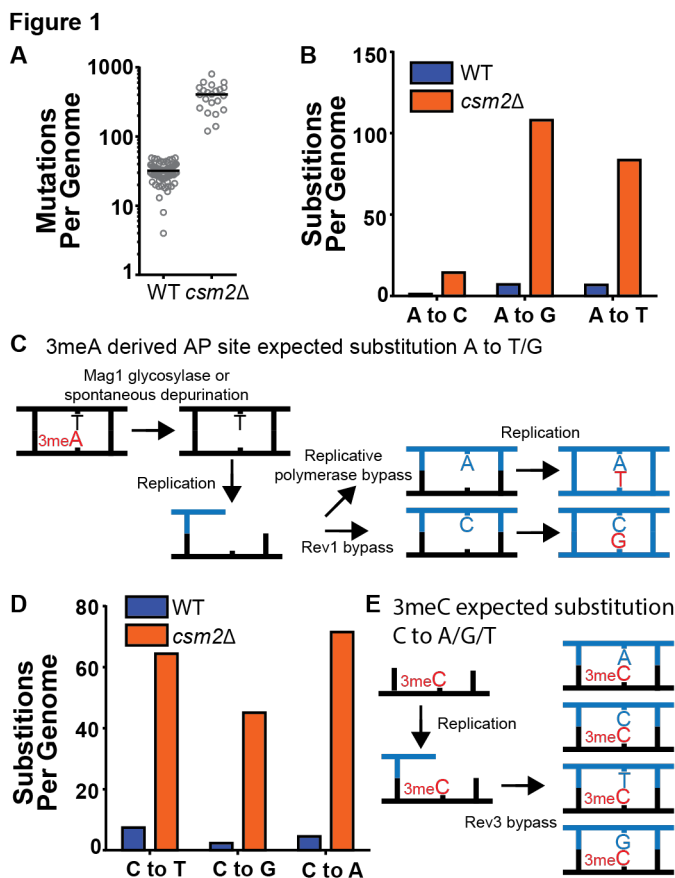

151

152 **Figure 1. *csm2Δ* Cells Chronically Exposed to MMS Exhibit Substitution Patterns Consistent with**  
 153 **TLS Activity Bypassing AP Sites and 3meC**

154 WT and *csm2Δ* cells were chronically exposed to MMS. WT and *csm2Δ* cells were chronically exposed  
 155 to 0.008% MMS by plating individual colonies onto rich medium containing MMS, after 2 days of  
 156 growth, the colonies were plated onto fresh medium containing MMS for 10 passages. DNA was  
 157 extracted from 90 colonies per genotype and deep sequenced.

158 (A) The number of mutations per genome for WT or *csm2Δ* cells chronically MMS-exposed. Horizontal  
 159 bar indicates the median value for each genotype.

160 (B) The average number of each type of A:T substitution per genome in MMS-treated WT and  
 161 *csm2Δ* cells.

162 (C) Schematic of how 3meA derived AP sites result in A to T/G mutations. 3meA is removed by the  
 163 Mag1 glycosylase or spontaneously depurinated resulting in an AP site. During DNA replication, the  
 164 replicative polymerase bypasses the AP site resulting in a T mutation or alternatively Rev1 bypasses the  
 165 AP site resulting in a G mutation.

166 (D) The average number of each type of G:C substitution per genome in MMS-treated WT and  
 167 *csm2Δ* cells.

168 (E) Schematic of how 3meC results in C to A/G/T base substitutions. 3meC occurs primarily in ssDNA  
 169 and during replication, Rev3 mediated bypass results in incorporation of A, T, G, or C nucleotides.

170

171 DNA lesions that arise at ssDNA often result in mutation patterns that exhibit strand bias



172 near origins of replication and at highly transcribed genes (Roberts, Sterling et al., 2012, Saini &  
173 Gordenin, 2020). Additionally, lesions subject to preferential repair of the transcribed DNA  
174 strand by transcription-coupled nucleotide excision repair (TC-NER) can also display  
175 transcriptional asymmetry (i.e. having higher mutation densities on the non-transcribed strand  
176 compared to the transcribed stand). We therefore evaluated whether mutations from our whole  
177 genome sequenced yeast displayed either transcriptional or replicative asymmetry (**Figure 2**).  
178 A:T mutations in both MMS-treated WT and *csm2Δ* yeast showed very little replicative  
179 asymmetry, but displayed transcriptional asymmetry, similar to that seen in MMS-treated *mag1Δ*  
180 yeast (Mao et al., 2017). The transcriptional asymmetry of A:T mutations in MMS-treated  
181 *mag1Δ* yeast results from TC-NER activity on unrepaired 3meA, indicating that the Shu complex  
182 may help prevent mutations associated with 3meA (Beranek, 1990, Sikora et al., 2010, Wyatt &  
183 Pittman, 2006). However, increased mutagenesis of the minor ssDNA specific lesion N1-methyl  
184 adenine (1meA) would also be expected to produce higher mutation densities on the non-  
185 transcribed strand. Therefore, we cannot exclude the possibility that 1meA contributes to the  
186 increased MMS-induced mutation rate in *csm2Δ* cells. G:C mutations in MMS-treated WT yeast  
187 displayed little to no transcriptional or replicative strand asymmetry, while the same mutations in  
188 MMS-exposed *csm2Δ* cells exhibited both types of strand bias (**Figure 2**). The transcriptional  
189 asymmetry displayed higher densities of C mutations on the non-transcribed strand, consistent  
190 with either TC-NER removal of 3meC or preferential formation of 3meCs on the transiently  
191 ssDNA non-transcribed strand, instead of an asymmetry derived for TC-NER of 7meG. We  
192 additionally note that transcriptional asymmetry of the 3meC in MMS-treated *csm2Δ* extends up  
193 to 167 bp upstream of the transcriptional start site. This may suggest that either TC-NER can  
194 function within this region or some ssDNA is assessable on the non-transcribed strand due to the

195 binding of TFIIH to the promoter region upstream of the TSS. Likewise, replicative asymmetry  
196 indicated elevated C mutations associated with the lagging strand template across the yeast  
197 genome, suggesting that 3meC lesions formed during lagging strand synthesis are bypassed in an  
198 error-free manner in Shu proficient yeast.

Figure 2

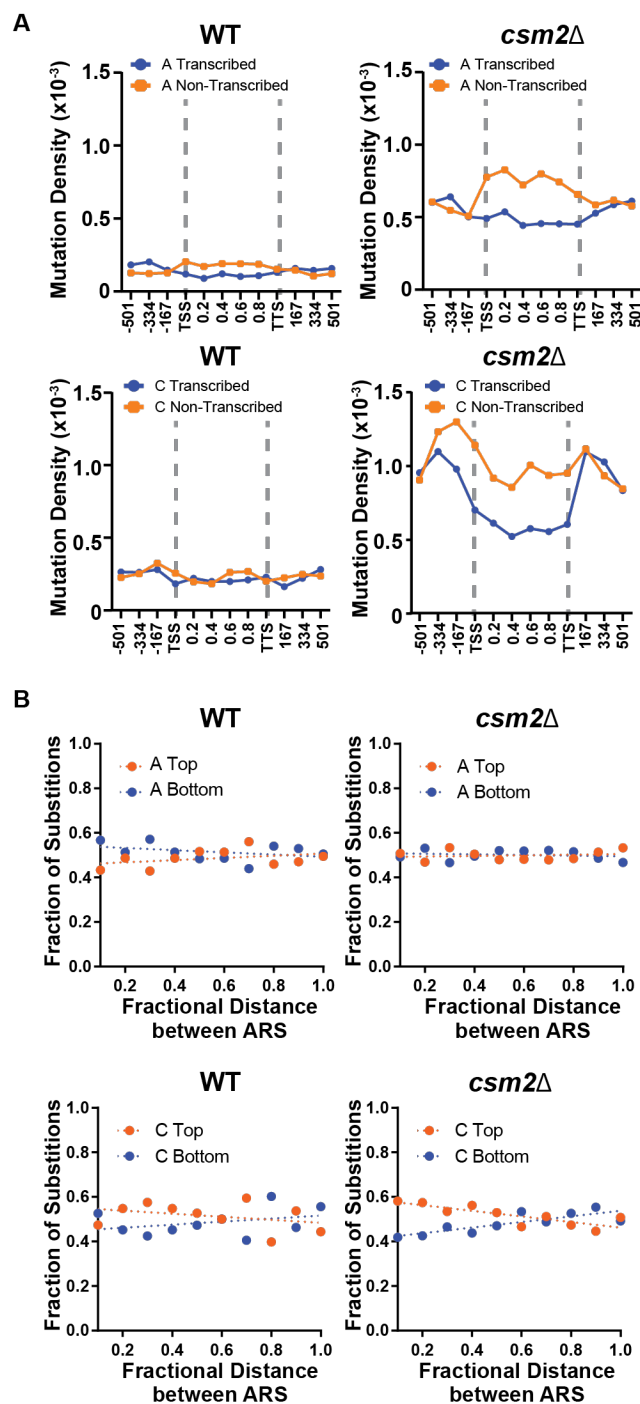

199

200 **Figure 2. Transcriptional and Replicative Strand Biases of MMS-Induced Substitutions**

201 (A) The density of A mutations (i.e. the fraction of A bases mutated) or C mutations on the transcribed  
 202 (blue) and non-transcribed (orange) strand across yeast transcripts in WT and *csm2Δ* cells. Transcript  
 203 regions were broken into fractional bins of 0.2 of the transcript length and the density of A or C mutations  
 204 determined per bin. 3 additional bins of 500 bp each were also included upstream of the transcription  
 205 start site (TSS) and downstream of the transcription termination site (TTS).

206 (B) The fraction of A and C mutations occurring on the top (orange) and bottom (blue) strands across  
207 replication units in the genomes of WT and *csm2Δ* cells. Replication units were broken into 0.1 fractional  
208 bins between neighboring origins of replication and the fraction of A mutations or C mutations associated  
209 with each strand were calculated per bin. The fraction of mutations for each strand across the replication  
210 unit was fitted with linear regression lines (dashed lines).  
211

## 212 ***ALKBH2* expression rescues the MMS-induced phenotypes of Shu complex deficient cells**

213         Based on the analysis of the mutation patterns, we hypothesized that the Shu complex  
214 promotes the error-free bypass of 3meC. 3meC can be repaired by the AlkB family of Fe(II)/ $\alpha$ -  
215 Ketoglutarate-dependent dioxygenases (Fedeles, Singh et al., 2015). This family is conserved  
216 from bacteria to humans; however, no yeast homolog has been found. Therefore, as of yet it  
217 remains unknown how yeast tolerates and repairs the highly toxic 3meC. In humans, there are  
218 nine AlkB homologs with *ALKBH2* and *ALKBH3* are responsible for 3meC DNA repair  
219 (Fedeles et al., 2015, Yi & He, 2013). We, therefore, reasoned that ectopic expression of AlkB  
220 homologs would rescue the MMS-induced phenotypes observed in Shu complex deficient cells.  
221 To test this, we took advantage of the lack of an AlkB homolog in yeast by ectopically  
222 expressing human AlkB homologs, *ALKBH2*, or *ALKBH3*, in *csm2Δ* cells and analyzed their  
223 effect on MMS sensitivity. *ALKBH2* and *ALKBH3* were expressed under the constitutive GAP  
224 promoter using a low-copy CEN plasmid. We find that both *ALKBH2* and *ALKBH3* expression  
225 leads to a partial rescue of the growth defects observed in MMS-exposed *csm2Δ* cells, with  
226 *ALKBH2* showing a stronger rescue (**Figure 3A**). Therefore, we focused on *ALKBH2* for the  
227 remainder of the experiments. As expected, *ALKBH2* expression very mildly rescues the MMS  
228 sensitivity of WT cells (**Figure 3A**). The growth defect rescue observed in MMS-treated *csm2Δ*  
229 cells depends on *ALKBH2*'s enzymatic activity since expression of an *ALKBH2* catalytic dead  
230 mutant (*ALKBH2*-V101R,F120E herein referred to as *alkbh2*-CD) (Monsen, Sundheim et al.,  
231 2010) does not rescue *csm2Δ* cell viability (**Figure 3B**). We confirmed that the inability of

232 *alkbh2*-CD to rescue *csm2Δ* cells was not due to lower protein expression (**Figure S2**). These  
233 findings are not specific to *csm2Δ* as *ALKBH2* rescues the MMS sensitivity of the other Shu  
234 complex members to the same extent (**Figure 3C**). The effect of *ALKBH2* expression on *csm2Δ*  
235 cell viability is specific for MMS damage as *ALKBH2* expression does not rescue the known  
236 growth defect observed in UV-treated *csm2Δ rev3Δ* double mutant cells (Xu, Ball et al., 2013)  
237 (**Figure 3D**).

238         Next, we analyzed the effect of *ALKBH2* expression on *csm2Δ* cells acutely exposed to  
239 MMS. To do this, we treated *ALKBH2*-expressing WT or *csm2Δ* cultures with 0.1% MMS for 30  
240 minutes. We then assessed cell survival by counting viable colonies after two days of growth.  
241 We observe that *ALKBH2* expression leads to a dose-dependent increase in the survival of *csm2Δ*  
242 cells, whereas in WT cells, survival is only mildly rescued (**Figure 3E**).

243         Since 3meC only occurs at ssDNA, which is a physiological intermediate of DNA  
244 replication, we reasoned that *ALKBH2* expression would preferentially rescue the survival of  
245 cells that are progressing through S-phase and therefore more vulnerable to 3meC-induced  
246 toxicity. To test this, we compared the survival of *ALKBH2*-expressing *csm2Δ* cells arrested in  
247 G1 in MMS containing media with *ALKBH2*-expressing *csm2Δ* cells progressing through S-  
248 phase. In agreement with our rationale, *ALKBH2* was found to rescue the survival phenotype  
249 only for cells progressing in the S phase of cell cycle (**Figure 3F**). This is consistent with  
250 previous data in human cells suggesting that *ALKBH2* functions preferentially in S-phase  
251 (Gilljam, Feyzi et al., 2009).

Figure 3

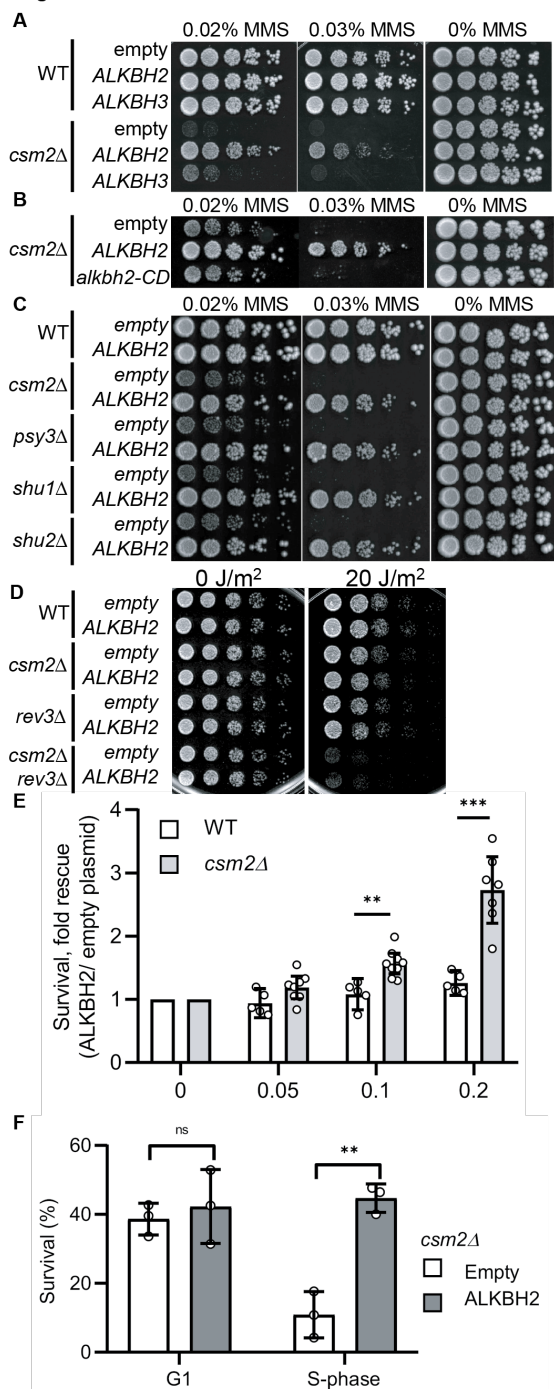

252

253 **Figure 3. Expression of Human *ALKBH2* Rescues the MMS Sensitivity of *csm2Δ* Cells**

254 (A) *csm2Δ* cells expressing *ALKBH2* exhibit decreased MMS sensitivity. Five-fold serial dilution of WT  
 255 or *csm2Δ* cells transformed with an empty plasmid, a plasmid expressing *ALKBH2* or a plasmid  
 256 expressing *ALKBH3* onto rich YPD medium or YPD medium containing the indicated MMS  
 257 concentration were incubated for 2 days at 30 °C prior to being photographed.

258 (B) The enzymatic activity of *ALKBH2* is required for the rescue of the MMS sensitivity of *csm2Δ* cells.

259 *csm2Δ* cells transformed with an empty plasmid, a plasmid expressing *ALKBH2* or a plasmid expressing a

260 catalytic dead *ALKBH2* mutant were diluted and plated as described in (A) and incubated for three days at  
261 30°C prior to being photographed.

262 (C) Expression of *ALKBH2* does not rescue the increased UV sensitivity observed in *esm2Δ rev3Δ* double  
263 mutants. Five-fold serial dilution of WT, *esm2Δ*, *rev3Δ*, or *rev3Δ esm2Δ* cells were transformed with an  
264 empty plasmid or a plasmid expressing *ALKBH2* and five-fold serially diluted onto rich YPD or rich YPD  
265 medium exposed to 20 J/m<sup>2</sup> ultra-violet (UV), and incubated for 2 days at 30 °C prior to being  
266 photographed. An untreated plate (0 J/m<sup>2</sup>) serves as a loading control.

267 (D) *ALKBH2* expression rescues the MMS sensitivity of cells with deletions of the four Shu complex  
268 genes. WT, *esm2Δ*, *psy3Δ*, *shu1Δ*, or *shu2Δ* cells transformed with an empty plasmid, or a plasmid  
269 expressing *ALKBH2* were five-fold serially diluted, plated and analyzed as described in (B).

270 (E) *esm2Δ* cells expressing *ALKBH2* exhibit increased survival after acute MMS treatment. YPD liquid  
271 cultures of WT or *esm2Δ* cells transformed with an empty plasmid or a plasmid expressing *ALKBH2* were  
272 treated with the indicated concentration of MMS following plating onto rich YPD medium. Colony  
273 number was assessed after incubation for two days at 30°C. Fold rescue of cellular survival represents the  
274 ratio of the survival of cells expressing *ALKBH2* relative to the survival of cells expressing the empty  
275 plasmid. Survival represents the number of colonies as a percentage of the colonies obtained without  
276 MMS treatment. The individual and mean values from five to nine experiments were plotted. Error bars  
277 indicate 95% confidence intervals. The *p*-values between WT and *esm2Δ* cells treated with 0.1% MMS  
278 and 0.2% MMS were calculated using an unpaired two-tailed Student's t-test and were  $p \leq 0.01$  and  
279  $p \leq 0.001$ , respectively.

280 (F) S-phase *esm2Δ* cells expressing *ALKBH2* exhibit increased survival after acute MMS treatment. WT  
281 or *esm2Δ* cells were synchronized on G1 with alpha factor and either released from G1 arrest or  
282 maintained in G1 in the presence or absence of 0.1% MMS. Cells were plated after 30 minutes of  
283 treatment and the colony number was assessed after incubation for two days at 30°C. Survival is  
284 calculated as described in (E). The mean values from three experiments were plotted with standard  
285 deviations. The *p*-values between control (empty plasmid) and *ALKBH2* expressing cells were calculated  
286 using an unpaired two-tailed Student's t-test and were  $p > 0.05$  (n.s.) and  $p \leq 0.001$  for the G1 and S-phase  
287 cells, respectively.

288

## 289 ***ALKBH2* expression alleviates the MMS-induced mutations observed in Shu complex** 290 **mutant, *esm2Δ***

291 Since 3meC is a mutagenic lesion, we asked whether *ALKBH2* expression would  
292 alleviate the observed mutational load of MMS-exposed *esm2Δ* cells. To do this, we utilized the  
293 *CAN1* reporter assay. The *CAN1* gene encodes for an arginine permease, therefore when cells are  
294 exposed to the toxic arginine analog canavanine, only cells that acquire mutations in the *CAN1*  
295 gene grow. *ALKBH2* expression decreased the mutation rates in MMS-exposed *esm2Δ* cells  
296 (Figure 4A). This decreased mutation rate is specific for alkylation lesions as *ALKBH2*  
297 expression fails to rescue the increase in spontaneous mutations observed in a Shu complex

298 mutant, *csm2Δ* cells (**Figure 4A**). Furthermore, the rescue of *csm2Δ* mutation rate by *ALKBH2*  
299 depends on *ALKBH2* catalytic activity (**Figure S3**). These spontaneous mutations are likely due  
300 to the TLS-mediated bypass of AP sites (Ball et al., 2009, Godin et al., 2016c, Rosenbaum et al.,  
301 2019, Shor et al., 2005, Shrivastav et al., 2010). To determine whether the decrease in mutations  
302 in MMS-treated, *ALKBH2*-expressing *csm2Δ* cells corresponds to the repair of 3meC, we  
303 sequenced the *CAN1* gene of canavanine resistant clones. Can-R isolates from MMS-treated  
304 *csm2Δ* cells displayed frequent mutation of the *CAN1* gene with substitutions at A:T and C:G  
305 bases as well as single nucleotide deletions and complex events consisting of two mutations  
306 separated by less than 10 bp that are a signature of error-prone trans-lesion synthesis (Northam et  
307 al., 2010, Sakamoto et al., 2007). Accordingly, *ALKBH2* expression in *csm2Δ* cells decreased the  
308 frequency of deletions, complex mutations, and substitutions at C:G base pairs (**Figure 4B**).  
309 These findings support a model in which the Shu complex prevents the cytotoxicity and  
310 mutagenicity of 3meC and in its absence, yeast are reliant on TLS to bypass these lesions  
311 resulting an increase of C:G substitutions, small deletions, and complex mutations.

312 We previously demonstrated that the Shu complex preferentially binds to double-flap  
313 DNA substrates and has a two-fold higher affinity for double-flap DNA containing an AP site  
314 analog (Godin et al., 2016c, Rosenbaum et al., 2019). Therefore, we asked whether the DNA  
315 binding subunits of the Shu complex, Csm2-Psy3, would similarly have higher affinity for  
316 double-flap DNA containing 3MeC. To address this, we examined the affinity of recombinant  
317 Csm2-Psy3 to a FAM-labeled double-flap substrate in the presence or absence of 3meC by  
318 fluorescence anisotropy (**Figure 4C**). Indeed, Csm2-Psy3 has a two-fold improved affinity for a  
319 double-flap substrate containing a 3meC lesion on the ssDNA at the ssDNA/dsDNA junction  
320 relative to unmodified substrate [3meC,  $K_d = 5.1 \pm 1.1$ ; C,  $K_d = 11.1 \pm 2.1$ ; **Figure 4C**]. These



321 results suggest that the Shu complex increases error-free bypass of 3meC by preferentially  
322 recognizing 3meC lesions on ssDNA in double-flap substrates.

Figure 4

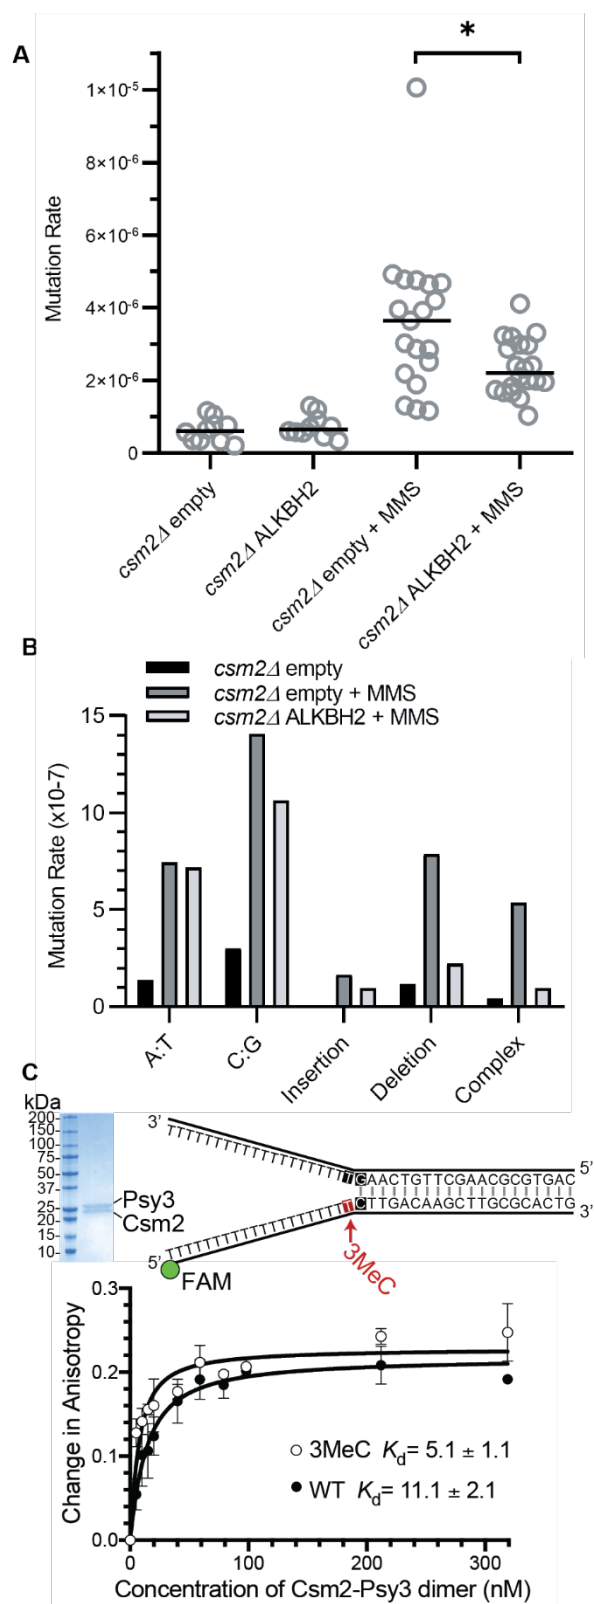

324 **Figure 4. *ALKBH2* Expression Rescues the 3meC-Induced Mutagenesis Observed in MMS Exposed**  
325 ***csm2Δ* Cells**

326 (A) *csm2Δ* cells expressing *ALKBH2* exhibit reduced MMS-induced mutation rate. Spontaneous and  
327 MMS-induced mutation rates at the *CAN1* locus were measured in *csm2Δ* cells transformed with an  
328 empty plasmid or a plasmid expressing *ALKBH2*. Each measurement (dots) and the median value of 10 to  
329 20 experiments (horizontal bar) were plotted. The *p*-values between control (empty plasmid) and  
330 *ALKBH2* expressing cells were calculated using a Mann-Whitney Ranked sum test and were  $p > 0.05$  and  
331  $p < 0.03$  for the untreated and MMS treated samples respectively.

332 (B) Sequencing of the *CAN1* gene in canavanine resistant colonies was used to calculate the frequency of  
333 MMS-induced substitutions, insertions, deletions, and complex mutations in *csm2Δ* cells transformed  
334 with either an empty vector or *ALKBH2* expression vector. *ALKBH2* expression significantly alters the  
335 MMS-induced mutation spectra ( $p = 0.018$  by Chi-square analysis comparing the number of A:T  
336 substitutions, C:G substitutions, insertions, deletions, and complex mutations between MMS-treated  
337 *csm2Δ* cells containing an empty vector or *ALKBH2* expression vector). The spectrum contains a  
338 reduction in C:G substitutions, deletions, and complex mutations, while A:T substitutions and insertions  
339 are unchanged.

340 (C) The Csm2-Psy3 protein has high affinity for a double-flap DNA substrate containing a 3meC lesion.  
341 A Coomassie stained SDS-PAGE gel of recombinant Csm2-Psy3, which run at 27.7 kDa and 28 kDa,  
342 respectively. Equilibrium titrations were performed by titrating Csm2-Psy3 into the FAM-labeled double-  
343 flap substrate in the presence (4.53 nM 3meC) or absence (5.11 nM WT) of a 3meC at the indicated  
344 position and anisotropy was measured. Triplicate experiments were performed with standard deviations  
345 plotted. The data were fit to a quadratic equation (one-site binding model assumed) and dissociation  
346 constants ( $K_d$ ) were calculated. Note the improved binding compared to previous studies (Rosenbaum et  
347 al., 2019) due to increased protein activity from improved constructs.

348

349 **3meC repair in yeast is channeled through error-free post-replicative repair**

350 The Shu complex directly functions with the canonical Rad51 paralogs, Rad55-Rad57,  
351 and Rad52 to promote HR through Rad51 filament formation (Gaines, Godin et al., 2015, Godin  
352 et al., 2013). In the context of error-free post-replicative repair, the Shu complex functions  
353 downstream of poly-ubiquitination of PCNA by Rad5-Ubc13-Mms2 (Xu et al., 2013). Therefore,  
354 we asked whether the rescue of the MMS-induced phenotypes by *ALKBH2* depends on Shu  
355 complex function as a Rad51 mediator. To address this question, we utilized a Csm2 mutant,  
356 *csm2-F46A*, that cannot stimulate Rad51 filament formation due to loss of its protein interaction  
357 with Rad55-Rad57 (Gaines et al., 2015, Godin et al., 2013). Suggesting that the Shu complex  
358 mediator function enables bypass of 3meC, we find that *ALKBH2* expression suppresses the  
359 MMS sensitivity of a *csm2-F46A* mutant to the same extent as a *csm2Δ* cell (**Figure 5A**). Next,

360 we asked whether the rescue of MMS sensitivity by *ALKBH2* would be observed in other HR  
361 mutants. To accomplish this, we ectopically expressed *ALKBH2* in cells with deletions of *CSM2*,  
362 *RAD51*, *RAD52*, *RAD55*, and *UBC13* and performed serial dilutions upon increasing-MMS  
363 dosage (**Figure 5B**). Surprisingly, *rad51Δ*, *rad52Δ*, and *rad55Δ* MMS sensitivity is not rescued  
364 by *ALKBH2* expression to the same extent as *csm2Δ* cells. In contrast, *ubc13Δ* MMS sensitivity  
365 is largely rescued by *ALKBH2* expression. This striking result suggests that the Shu complex  
366 functions primarily within Ubc13-initiated post-replicative repair pathway, while the canonical  
367 HR genes are also critical for the repair of DSBs induced by MMS through clustered lesions.  
368 Unlike Shu complex mutant cells, deletion of the canonical HR genes leaves cells vulnerable to  
369 toxic MMS-induced DSBs formed from lesions that are not subject to *ALKBH2* direct reversal.

370 To explore this idea further, we investigated the effect of *ALKBH2* in a *RAD55*  
371 phosphorylation mutant that is MMS sensitive while maintaining its DSB-repair proficiency  
372 (Herzberg, Bashkirov et al., 2006). In this *RAD55* mutant, three serine residues (2,8,14) are  
373 mutated to alanine residues (*rad55-S2,8,14A*). Since the *rad55-S2,8,14A* mutant cells largely  
374 phenocopy the defects observed in a Shu complex mutant (Herzberg et al., 2006), we asked  
375 whether Rad55 function in MMS-induced DNA damage may be uncoupled from its role in  
376 canonical DSB repair. Unlike *rad55Δ* cells, the *rad55-S2,8,14A* mutant MMS sensitivity is  
377 largely rescued by *ALKBH2* expression (**Figure 5C**). To further investigate the genetic  
378 relationship between the Shu complex and Rad55, we combined either *rad55Δ* or *rad55-*  
379 *S2,8,14A* with a *csm2Δ* mutant. As previously reported, *csm2Δ rad55Δ* double mutants exhibit  
380 the same MMS sensitivity as a *rad55Δ* mutant cell (Godin et al., 2013). In contrast, a *csm2Δ*  
381 *rad55-S2,8,14A* double mutant exhibits the same MMS sensitivity as a single *csm2Δ* cell (**Figure**  
382 **5D**). This observation is surprising since the Shu complex is thought to function downstream of

383 Rad55. However, it is consistent with the specificity of the Shu complex in directly recognizing  
384 and enabling tolerance of MMS-induced DNA lesions (Rosenbaum et al., 2019).

385 Rad55 directly interacts with Csm2-Psy3 (Gaines et al., 2015, Godin et al., 2013). While  
386 Rad55-S2,8,14A mutant maintains its protein interactions with Rad57, Rad51, and Rad52, its  
387 interaction with the Shu complex has yet to be determined (Herzberg et al., 2006). Therefore, the  
388 Shu complex may help recruit Rad55 to specific MMS-induced DNA lesions through an  
389 interaction with phosphorylated Rad55 or at the interface where Rad55 is phosphorylated. To test  
390 this, we performed Y2H analysis of Rad55 or Rad55-S2,8,14S with Csm2 (**Figure 5E**).

391 Interestingly, we observe a reduced interaction between Rad55-S2,8,14S with Csm2 (**Figure**  
392 **5E**). These results suggest that Rad55 phosphorylation may stimulate its interaction with Csm2  
393 or that Csm2 interacts with Rad55 in that region. In the context of MMS-induced DNA damage,  
394 our findings suggest that the Shu complex is likely contributing to the recognition of specific  
395 MMS-induced lesions and recruiting the HR machinery, such as Rad55-Rad57, to the lesion to  
396 facilitate their bypass and enable their repair following replication. Furthermore, other factors,  
397 such as a stalled replication fork, may also contribute to their recruitment.

Figure 5

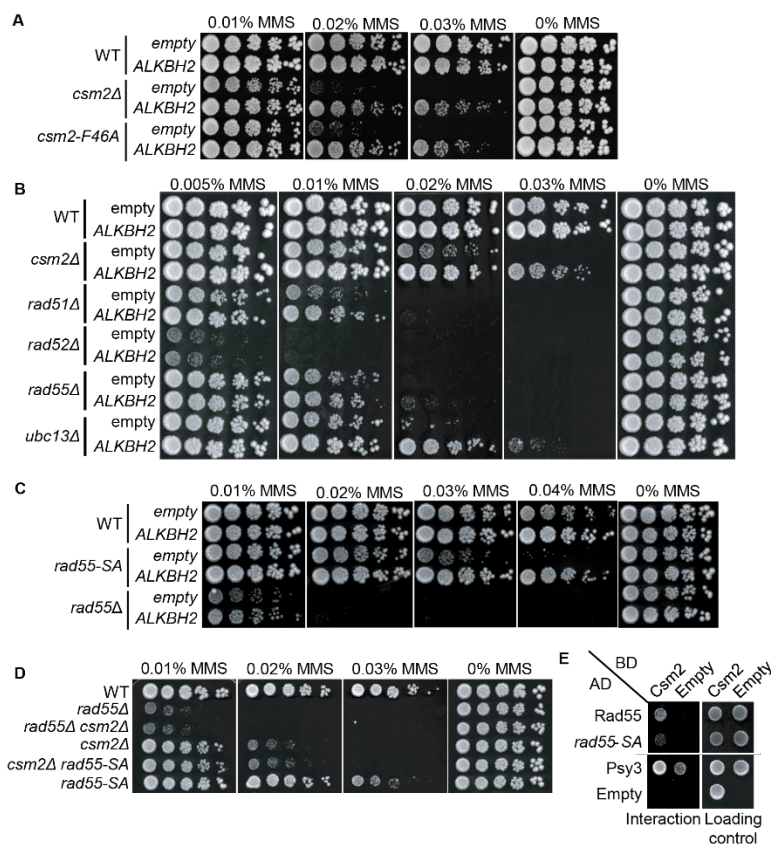

398

399 **Figure 5. 3meC are Bypassed by the Error-Free Post Replicative Repair (PRR) Pathway**

400 (A) *ALKBH2* rescues the MMS sensitivity of a *csm2-F46A* mutant, which is deficient for its Rad51  
 401 mediator activity. Five-fold serial dilution of WT, *csm2Δ*, or *csm2-F46A* cells were transformed with an  
 402 empty plasmid or a plasmid expressing *ALKBH2* onto rich YPD medium or YPD medium containing the  
 403 indicated MMS concentration and incubated for 3 days at 30°C prior to being photographed.

404 (B) Unlike PRR mutant *UBC13*, expression of *ALKBH2* mildly rescues the MMS sensitivity of HR  
 405 factors, *RAD51*, *RAD52*, and *RAD55*. Five-fold serial dilution of WT, *csm2Δ*, *rad51Δ*, *rad52Δ*, *rad55Δ*, or  
 406 *ubc13Δ* transformed with an empty plasmid or a plasmid expressing *ALKBH2* were five-fold serially  
 407 diluted, plated, and analyzed as described in (A).

408 (C) *rad55-S2,8,14A* cells expressing *ALKBH2* exhibit decreased MMS sensitivity. WT, *rad55-S2,8,14A*,  
 409 or *rad55Δ* cells transformed with an empty plasmid or a plasmid expressing *ALKBH2* were five-fold  
 410 serially diluted, plated, and analyzed as described in (A).

411 (D) *csm2Δ* is epistatic to *rad55-S2,8,14A* for MMS damage. Cells with the indicated genotypes were five-  
 412 fold serially diluted and plated as described in (A), and incubated for 2 days at 30°C prior to being  
 413 photographed.

414 (E) *rad55-S2,8,14A* exhibit an impaired yeast-2-hybrid (Y2H) interaction with Csm2. Y2H analysis of  
 415 pGAD-*RAD55*, *rad55-S2,8,14A*, *PSY3*, or pGAD-C1 (Empty) with pGBD-*RAD57*, *CSM2*, pGBD-C1  
 416 (Empty). A Y2H interaction is indicated by plating equal cell numbers on SC medium lacking histidine,  
 417 tryptophan, and leucine. Equal cell loading is determined by plating on SC medium lacking tryptophan  
 418 and leucine used to select for the pGAD (AD) and pGBD (BD) plasmids.

419

## 420 DISCUSSION

421           Among the many alkylation-induced DNA lesions, 3meC is well noted due to its  
422 cytotoxic and mutagenic impact during DNA replication (Nieminuszczy, Mielecki et al., 2009,  
423 Shrivastav et al., 2010, Sikora et al., 2010). In eukaryotes, the adduct is formed endogenously  
424 from S-adenosyl methionine (SAM) reactivity with DNA and from the enzymatic activity of  
425 DNA methyltransferases, and exogenously from alkylating agents such as nitrosamines, which  
426 are present in the tobacco smoke, temozolomide, or MMS (Chatterjee & Walker, 2017, Dango,  
427 Mosammaparast et al., 2011, Pataillot-Meakin, Pillay et al., 2016, Rosic, Amouroux et al., 2018).  
428 3meC occurs primarily in ssDNA and can stall the replicative polymerases. Unlike bacteria and  
429 higher eukaryotes, yeast does not encode for an enzyme capable of directly repairing 3meC from  
430 ssDNA (Admiraal, Eyler et al., 2019, Sedgwick et al., 2007). Therefore, yeast rely on bypass  
431 mechanisms to complete DNA replication. Here, we utilized the budding yeast model to  
432 demonstrate that the Shu complex facilitates an HR-mediated error-free bypass of alkylation  
433 damage, including 3meC and AP sites, to prevent mutagenesis and toxicity.

434           The Shu complex is primarily involved in tolerance of replicative base-template damage,  
435 being dispensable for DSB repair (Ball et al., 2009, Godin et al., 2016c). This makes the Shu  
436 complex ideal to dissect the role of HR during bypass of specific base lesions. The major  
437 phenotypes observed in MMS-exposed Shu complex disrupted cells are decreased cell survival  
438 and elevated mutation frequency (Ball et al., 2009, Godin et al., 2016b, Shor et al., 2005). We  
439 observe that *ALKBH2* expression specifically alleviates the MMS-induced phenotypes of Shu  
440 complex disrupted cells (**Figures 3 and 4**). This *ALKBH2* rescue is partial, which is consistent  
441 with the Shu complex role in tolerance of another MMS-induced lesion, an AP site (Godin, Lee  
442 et al., 2016a, Rosenbaum et al., 2019). Although it is not possible to specifically induce 3meC, it

443 is possible to regulate the occurrence of its template, by controlling the amount of ssDNA in  
444 MMS-exposed cells. It would be interesting to observe how the rescue by expression of *ALKBH2*  
445 correlates with the amount of ssDNA. Consistently, our results show that *ALKBH2* is only able  
446 to rescue the MMS sensitivity of Shu complex mutant cells that are progressing through S-phase  
447 and therefore exhibit ssDNA intermediates (**Figure 3E**). Furthermore, we find that Shu complex  
448 members, Csm2-Psy3, have a higher binding affinity for a double-flap substrate containing  
449 3meC lesions on the ssDNA lagging strand (**Figure 4C**).

450         The error-free PRR pathway requires polyubiquitination of PCNA by Mms2-Ubc13-Rad5  
451 and the activity of the core HR machinery (Branzei & Szakal, 2017, Xu, Blackwell et al., 2015).  
452 Interestingly, the deletion of other HR factors, such as *RAD51*, are only partially rescued by  
453 *ALKBH2* expression (**Figure 5B**). This can be explained by their critical role in DSB repair, an  
454 activity for which the Shu complex is largely dispensable. Our results are consistent with 3meC  
455 being bypassed by the HR branch of the PRR pathway (**Figure 6**) and the notion that the Shu  
456 complex is an HR factor specialized for replication-damage.



**Figure 6**

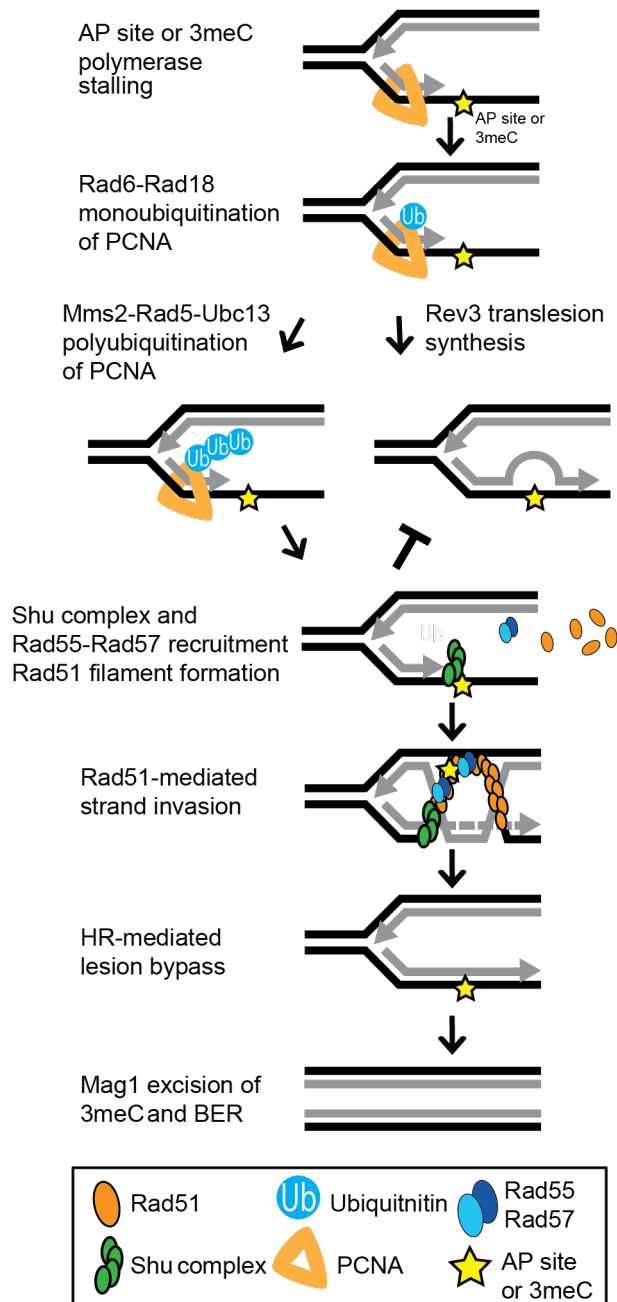

457

458 **Figure 6. Model of Shu Complex-Mediated Error-Free Bypass of AP Sites and 3meC**

459 MMS-induced AP sites and 3meC (yellow star) arising at DNA replication intermediates at ssDNA can  
 460 stall the replicative polymerase. Replication fork stalling leads to PCNA (orange triangle) K63-linked  
 461 polyubiquitination of lysine 164 (K164) by the sequential activities of the Rad6-Rad18 and  
 462 Mms2-Rad5-Ubc18 complexes. The Shu complex (green ovals) through its DNA-binding components, Csm2-Psy3,  
 463 binds to 3meC at a double-flap DNA junction to promote Rad55-Rad57 (blue ovals) recruitment and  
 464 Rad51 filament formation (orange ovals). Thus, enabling Rad51-mediated HR with the newly synthesized  
 465 sister chromatid. Importantly, the Shu complex activity prevents mutagenesis from TLS-mediated error-

466 prone bypass of 3meC. After DNA synthesis using the undamaged sister chromatid as template, the HR  
467 intermediates are resolved. The error-free bypass of 3meC enables S-phase completion in a timely  
468 manner. Finally, after replication is completed, 3meC are likely recognized and excised by the Mag1  
469 glycosylase, which initiates the BER-mediated repair.

470

471 It is important to note that TLS can bypass 3meA directly and can also contribute to the  
472 mutation pattern observed for both WT and *csm2Δ* cells. Direct TLS bypass of 3meA leads to a  
473 mutation pattern of elevated A->T substitutions (Shrivastav et al., 2010). Therefore, we cannot  
474 rule out the contribution of direct TLS bypass of 3meA to the mutation pattern observed in our  
475 sequence analysis. However, previous work from our group has provided genetic, *in vivo*, and *in*  
476 *vitro* evidence of the Shu complex role in the error-free bypass of AP sites specifically (Godin  
477 2016, Rosenbaum 2019).

478 AlkB proteins are also able to repair 1meA, which primarily occurs at ssDNA (Fedeles et  
479 al., 2015). Like 3meC, 1meA is a toxic and mutagenic adduct (Shrivastav et al., 2010). It  
480 possible that this lesion is also bypassed by the Shu complex and the error-free PRR pathway.  
481 Hence, we cannot rule out that ALKBH2 repair of 1meA may also contributes to the rescue of  
482 MMS-induced phenotypes that we observe. However, it is evident from our sequence analysis  
483 that the Shu complex contributes to the bypass of lesions occurring at G:C base pairs, which  
484 excludes 1meA. Moreover, 3meC is likely the main lesion contributing to mutagenesis from  
485 MMS at ssDNA (Saini et al., 2020, Yang et al., 2010).

486 A previous study claimed that yeast *TPAI* is an AlkB homolog (Shivange, Kodipelli et al.,  
487 2014). However, in our hands, and consistent with a recent report (Admiraal et al., 2019), *tpa1Δ*  
488 cells show no increased sensitivity to MMS. Furthermore, unlike other genes that are involved in  
489 repairing MMS-induced lesions, we find that *TPAI* does not exhibit a synthetic sick phenotype  
490 with Shu complex mutants upon MMS exposure (**Figure S4**). Recently, the Mag1 glycosylase was

491 shown to excise 3meC in dsDNA; therefore, initiating their repair through BER (Admiraal et al.,  
492 2019). However, Mag1 cannot excise 3meCs from ssDNA (Admiraal et al., 2019). Whole genome  
493 sequencing of MMS-treated *mag1Δ* yeast also contain primarily an elevation of substitutions at  
494 A:T base pairs indicating that Mag1 activity in yeast contributes little to protecting against 3meC-  
495 induced mutations. This is likely due to the restriction of these lesions to ssDNA and highlights  
496 the need for a mechanism to bypass this lesion during DNA replication (**Figure 6**). Mag1 likely  
497 plays a significant role in the removal of 3meC from dsDNA after its Shu complex-mediated  
498 bypass allows replication to be completed (**Figure 6**).

499         Previous work from our group and others show that the Shu complex role is functionally  
500 conserved in humans and mice (Abreu, Prakash et al., 2018, Martino & Bernstein, 2016,  
501 Martino, Brunette et al., 2019). Additionally, human cells containing Shu complex deletions are  
502 sensitive to MMS and DNA alkylating agents. Therefore, future studies will address whether the  
503 human Shu complex functions as a back-up of the ALKBH enzymes in tolerating mutagenesis  
504 and toxicity from 3meC. This is of particular importance since both *ALKBH2* and *ALKBH3* have  
505 been proposed as tumor suppressors, being silenced in various tumors, including gastric and  
506 breast cancer (Fedeles et al., 2015, Gao, Li et al., 2011, Knijnenburg, Wang et al., 2018,  
507 Stefansson, Hermanowicz et al., 2017). On the other hand, *ALKBH3* is often overexpressed in  
508 different cancers and inhibition of *ALKBH2* and *ALKBH3* can sensitize cancer cells to alkylating  
509 chemotherapy (Choi, Jang et al., 2011, Koike, Ueda et al., 2012, Tasaki, Shimada et al., 2011,  
510 Wang, Wu et al., 2015, Wu, Xu et al., 2011). Moreover, *ALKBH2* and *ALKBH3* upregulation  
511 mediates resistance to chemotherapeutic agents such as temozolomide and *ALKBH3* loss leads to  
512 endogenous 3meC accumulation in tumors cell lines (Cetica, Genitori et al., 2009, Dango et al.,  
513 2011, Johannessen, Prestegarden et al., 2013). A connection between the human RAD51 paralog,

514 RAD51C, and ALKBH3 was recently described where RAD51C was important for recruitment  
515 of ALKBH3 to DNA with 3meC. A role of the Shu complex promoting tolerance of 3meC could  
516 provide a new avenue for therapeutic approaches to target these tumors.

517

## 518 **MATERIALS AND METHODS**

### 519 **Yeast strains, plasmids, and oligos**

520 The strains utilized are listed in **Supplemental Table 1** whereas all oligonucleotides used are  
521 listed in **Supplemental Table 2**. The Y2H strains PJ69-4A and PJ69-4 $\alpha$  were used as described  
522 (Godin et al., 2013, James, Halladay et al., 1996). All strains are isogenic with W303 RAD5+  
523 W1588-4C (Thomas & Rothstein, 1989) and W5059-1B (Zhao, Muller et al., 1998). KBY-1088-  
524 3C (rad55-S2,8,14A) was generated by transformation of a cassette containing the 50 bp  
525 homology upstream of the *RAD55* start codon and the rad55-S2,8,14A ORF fused to a kanMX6  
526 resistance cassette and the 50 bp homology downstream of the *RAD55* stop codon. This fused  
527 cassette was obtained using Gibson Assembly® Master Mix (NEB) following the manufacturer's  
528 instructions and the primers used to generate the assembly fragments were designed using  
529 NEBuilder Assembly Tool (<https://nebuilder.neb.com>). The rad55-S2,8,14A gene fragment was  
530 commercially synthesized whereas the kanMX6 cassette was amplified from the pFA6a-kanMX6  
531 plasmid (Longtine, McKenzie et al., 1998). Prior to transformation, the fused product was PCR  
532 amplified using primers with 50nt of homology to the flanking regions of *RAD55* as described  
533 (Longtine et al., 1998). All yeast transformations were performed as described (Sherman, Fink et  
534 al., 1986). The integration of the rad55-S2,8,14A ORF was verified by PR amplification  
535 followed by sequencing using the KanHisNat and Rad55.Check oligos as described in as

536 described (Longtine et al., 1998). pGAD-rad55-S2,8,14A was generated using Gibson  
537 Assembly® Master Mix (NEB) following the manufacturer's instructions and the primers used  
538 to generate the assembly fragments were designed using NEBuilder Assembly Tool  
539 (<https://nebuilder.neb.com>). ALKBH2 and ALKBH3 were cloned in the pAG416GPD-ccdB  
540 vector (Plasmid #14148 Addgene). pAG416GPD-ccdB-ALKBH2-CD was generated by site-  
541 directed mutagenesis of the pAG416GPD-ccdB-ALKBH2 plasmid as described (Zheng,  
542 Baumann et al., 2004) with minor adaptations according to the manufacturer's recommendations  
543 for PCR using Phusion High-Fidelity PCR Master Mix with HF Buffer (Thermo). All knock-outs  
544 were generated using the S1 and S2 primers and knock-out cassettes as described in (Longtine et  
545 al., 1998). All plasmids and strains were verified by DNA sequencing.

546

#### 547 **Chronic MMS Exposure and DNA Whole Genome Sequencing**

548 Individual colonies of WT or *csn2Δ* cells were grown overnight at 30°C. The cultures were then  
549 pinned onto YPD medium containing 0.008% MMS using a pinning robot from S&P Robotics.  
550 After a 2-day incubation at 30°C the plates were replica-plated onto YPD plates containing  
551 0.008% MMS using a robotic pinner, and then replated onto fresh YPD medium containing  
552 0.008% MMS a total of 10 times. The MMS-exposed yeast were separated into single colonies  
553 (96 per strain). These colonies were inoculated in YPD cultures and grown overnight at 30°C.  
554 Genomic DNA was extracted from each culture by resuspending the yeast pellets in lysis buffer  
555 (20 mM Tris-Cl, 200 mM LiAc, 1.5% SDS, pH7.4), incubating the yeast for 15 min at 70°C,  
556 incubating on ice for 10 min, adding an equal volume of 4M NaCl, and centrifuging the samples  
557 at maximum speed for 30 minutes at 4°C. The supernatant was then added to an equal volume of  
558 phenol:chloroform:isoamyl alcohol (PCI). An equal volume of isopropanol was added to the

559 aqueous phase of the PCI extraction. The DNA pellet was washed twice with 70% ethanol prior  
560 to resuspending in 10 mM Tris 8 buffer. The DNA the subjected to Illumina whole genome  
561 sequencing. 1 µg of genomic DNA per sample was sheared and used to generate libraries for  
562 sequencing with a KAPA DNA HyperPrep kit. Multiplexed libraries were sequenced with 96  
563 samples on a single lane of an Illumina Hiseq4000. Illumina reads were aligned to the Saccerc3  
564 S288C reference genome with CLC Genomics Workbench version 7.5. CLC Genomics  
565 Workbench was also used to identify mutations from these alignments using methods similar to  
566 those previously described (Sakofsky, Roberts et al., 2014). Briefly, mutations were identified as  
567 differences from the reference genome that were greater than 9 reads covering the site, and for  
568 which between 45-55% of the reads supported the mutation. Additionally, any mutations  
569 occurring in multiple samples were removed from analyses as likely polymorphisms or  
570 alignment artifacts. The complete list of mutations is provided in **Supplemental Table 3**. Raw  
571 sequencing reads in fastq format have been submitted to the NCBI short read archive under  
572 BioProject accession number PRJNA694993.

573

## 574 **Growth Assays**

575 Individual colonies of the indicated strains were transformed with an empty plasmid or a plasmid  
576 expressing ALKBH2 as indicated. The cultures were grown in 3ml YPD or SC-URA medium  
577 overnight at 30°C. Five-fold serial dilutions were performed (Godin et al., 2016c) except that 5  
578 µL of culture at 0.2 OD<sub>600</sub> were 5-fold serially diluted onto YPD medium or YPD medium  
579 containing the indicated MMS concentration. UV treatment was performed using Stratagene  
580 Stratalinker 2400 UV Crosslinker. The plates were imaged after 48 h or 72 h of incubation at  
581 30°C and the brightness and contrast was globally adjusted using Photoshop (Adobe Systems

582 Incorporated).

583

### 584 **Protein Blotting**

585 Parental and *csm2Δ* cells were transformed with an empty plasmid or plasmid expressing either  
586 ALKBH2 or ALKBH2-CD. The cultures were grown in SC-URA medium overnight at 30°C.  
587 Subsequently, equal cell numbers (1 ml 0.75 OD<sub>600</sub>) from each culture were pelleted, supernatant  
588 was removed, and washed once with ddH<sub>2</sub>O and pelleted again. Protein was extracted from  
589 whole cell lysates by TCA preparation as described in 51 μl of loading buffer (Knop et al. 1999).  
590 The 13 μl of protein was run on a 10% SDS-PAGE gel and transferred to a PDVF membrane by  
591 semidry transfer (Bio-Rad) at 13V for 90 min. ALKBH2 or Kar2 was Western blotted using  
592 αALKBH2 antibody [AbCam (ab154859); 1:1000 with secondary antibody anti-rabbit (Jackson  
593 ImmunoResearch Laboratories 1:10,000)] or αKar2 antibody [Santa Cruz (sc-33630); 1:5000 with  
594 secondary antibody anti-rabbit (Jackson ImmunoResearch Laboratories 1:10,000)] as a loading  
595 control.

596

### 597 **Survival Assays**

598 Individual colonies of WT or *csm2Δ* cells were transformed with an empty plasmid or a plasmid  
599 expressing *ALKBH2* and grown in 3ml SC-URA medium at 30°C overnight. The cultures were  
600 diluted to 0.2 OD<sub>600</sub> in 50 ml SC-URA medium and grown for 3-4 h at 30°C. The cultures were  
601 all diluted to 0.2 OD<sub>600</sub> in YPD or YPD containing 0.05%, 0.1% or 0.2% MMS and incubated for  
602 30 minutes at 30°C. After the treatment, the cultures were washed twice with YPD and  
603 resuspended to 0.2 OD<sub>600</sub> in YPD. The cultures were diluted 1/10000 (untreated and 0.05%

604 MMS) or 1/1000 (0.1% and 0.2% MMS) and 150 ul were plated in YPD medium plates in  
605 duplicate. The plates were incubated at 30°C for 2 days before imaging. The colonies were  
606 counted using OpenCFU (Geissmann, 2013). Data from 5 to 9 colonies from at least 3  
607 independent transformants was used.

608

### 609 **Canavanine Mutagenesis Assay**

610 Individual colonies of the indicated strains were transformed with an empty plasmid or a plasmid  
611 expressing *ALKBH2* and grown in 3ml SC-URA medium or SC-URA medium containing  
612 0.00033% MMS for 20 h at 30°C. The cultures were diluted to 3.0 OD<sub>600</sub>. 150 ul were plated on  
613 SC-ARG+CAN (0.006% canavanine) medium in duplicate or 150 ul of a 1:10,000 dilution were  
614 plated on SC medium in duplicate. The plates were then incubated for 48 hours at 30°C before  
615 imaging. The colonies were counted using OpenCFU (Geissmann, 2013) to measure total cell  
616 number (SC) or forward mutation rates (SC-ARG+CAN). The mutation frequency was obtained  
617 by dividing colony number in SC-ARG+CAN by the number obtained in the SC plates times the  
618 dilution factor. Mutation frequencies were converted to mutation rates using methods described  
619 (Drake, 1991). Data from 10 to 20 colonies from at least three independent transformants was  
620 used. Differences in mutation rates were evaluated using a Mann-Whitney rank sum test  
621 comparing the independent rate measurements between untreated *csm2Δ* yeast expressing either  
622 an empty vector control or *ALKBH2* and between MMS-treated *csm2Δ* yeast expressing either an  
623 empty vector control or *ALKBH2*. Mutations occurring within the *CAN1* gene were identified by  
624 selecting independent canavanine resistant colonies, isolating genomic DNA from these samples,  
625 and PCR amplifying the *CAN1* gene from each isolate with primers containing unique barcodes  
626 (**Supplemental Table 4**). These PCR products were pooled and sequenced on a PacBio Sequel



627 sequencer as in (Hoopes et al., 2017). PacBio reads were separated by barcodes and aligned to  
628 the *CAN1* gene sequence using Geneious software. Geneious was also used to identify mutations  
629 among these alignments as differences from the reference *CAN1* sequence that are supported by  
630 two or more independent reads that occur in greater than 30% of all reads for each sample. 452  
631 out of 458 mutations identified were supported by greater than 50% of the reads for the sample.  
632 All mutations identified by PacBio sequencing are provided in **Supplemental Table 5**.

633

### 634 **Yeast-Two-Hybrid Assays**

635 The yeast-two-hybrid experiments using the indicated pGAD and pGBD plasmids were  
636 performed (Godin et al., 2013) except that both pGAD and pGBD plasmids were transformed  
637 into PJ69-4A (James et al., 1996). A yeast-two-hybrid interaction is indicated by growth on  
638 synthetic complete (SC) medium lacking histidine, tryptophan, and leucine whereas equal cell  
639 loading was observed by plating the cells on SC medium lacking tryptophan and leucine to select  
640 for the pGAD (leucine) or pGBD (tryptophan) plasmids.

641

### 642 **Csm2-Psy3 Purification**

643 The Csm2-Psy3 heterodimer was cloned into the dual expression plasmid pRSFDuet (EMD  
644 Millipore) which encode a Strep-tagged Csm2 and FLAG-tagged Psy3. All affinity tags were  
645 fused to the N-terminus of the protein. This plasmid was transformed into *E.coli* (Rosetta  
646 P.LysS) and grown at 37°C until 0.6 OD<sub>600</sub> and recombinant protein expression was induced by  
647 addition of 0.5 mM isopropyl beta thiogalactoside (IPTG) at 18°C overnight for 16–18 h. Cells  
648 were harvested by centrifugation and pellets were frozen at -80°C. Approximately 38 g of cell  
649 pellet was lysed in 80 mL of lysis buffer containing 25 mM Tris (pH 7.4), 300 mM KCl, 10%

650 glycerol, 5 mM  $\beta$ -mercaptoethanol supplemented with protease inhibitors (Roche), 1mM PMSF,  
651 1 mM  $ZnCl_2$  and 0.01% IGEPAL CA-630. Cells were lysed using an emulsiflex and centrifuged  
652 at  $15,000 \times g$  for 1 h at  $4^\circ C$ . Lysed supernatant was incubated with 5 mL of ANTI-FLAG M2  
653 affinity resin (Sigma) overnight and then washed in a solution consisting of 25 mM Tris (pH  
654 7.4), 150 mM KCl, 10% glycerol, and 0.01% IGEPAL CA-630. To elute bound Csm2-Psy3, the  
655 wash buffer was supplemented with 0.1mg/mL 3X-FLAG peptide (Sigma). Elutions were then  
656 loaded onto a HiTrap Heparin HP (GE Healthcare) affinity chromatography. The complex was  
657 loaded onto the column and washed for 200 mL with (25 mM Tris (pH 7.4), 150 mM KCl, 1 mM  
658 DTT, 10% glycerol, and 0.01% IGEPAL CA-630). The complex was eluted with a gradient  
659 elution from 0% to 100% (25 mM Tris (pH 7.4), 150 mM KCl, 1 mM DTT, 10% glycerol, and  
660 0.01% IGEPAL CA-630) over 20 mL. The Csm2-Psy3 protein typically eluted around 400–  
661 600 mM NaCl. Then, Csm2-Psy3 Heparin elutions were subsequently purified by size exclusion  
662 chromatography using a Sephacryl S200 column (GE Healthcare) in buffer (25 mM Tris (pH  
663 7.4), 150 mM KCl, 1 mM DTT, 10% glycerol, and 0.01% IGEPAL CA-630) eluting as a single  
664 peak and visualized as heterodimers by SDS-PAGE electrophoresis. Csm2-Psy3 protein  
665 concentration was determined by BCA Assay as previously described (Rosenbaum et al., 2019).

## 666 **Substrates for Fluorescence Anisotropy**

|            |                                                               |
|------------|---------------------------------------------------------------|
| WT         | 5'-CAGTGC GCAAGCTTGTCAAGTTTTTTTTTTTTTTTTTTT-3'                |
| WTT-5'FAM  | 5'/56-FAM/TTTTTTTTTTTTTTTTTTTTCCTTGACAAGCTTGCGCACTG-3'        |
| 3meC-5'FAM | 5'/56-FAM/TTTTTTTTTTTTTTTTTTT/i3Me-dC/CTTGACAAGCTTGCGCACTG-3' |

## 667 **Equilibrium Fluorescence Anisotropy Assays**

668 Anisotropy experiments were performed using a FluoroMax-3 spectrofluorometer (HORIBA  
669 Scientific) on and a Cary Eclipse Spectrophotometer. All substrates used for anisotropy

670 contained a 5'-FAM moiety incorporated at the end of the single-stranded end of the fork (**Figure**  
671 **4C**). Substrates either contained a thymidine (T) or 3meC at the double-flap junction in the  
672 ssDNA. Anisotropy measurements were recorded in a 150  $\mu$ L cuvette containing 20 mM Tris pH  
673 8.0 and 5.11 or 4.53 nM of FAM-labeled double-flap substrate as a premixed sample of purified  
674 Csm2-Psy3 protein and substrate (5.11 nM WT + 1.6  $\mu$ M Csm2-Psy3 dimer in 50 nM NaCl) was  
675 titrated into the cuvette. Fluorescence anisotropy measurements were recorded using the  
676 integrated polarizer and excitation and emission wavelengths of 495 and 520 nm, respectively,  
677 with slit widths of 10 nm. Titrations were carried out at 25°C and were carried out until  
678 anisotropy became unchanged. All experiments were performed in triplicate. Dissociation  
679 constants ( $K_d$ ) were calculated by fitting our data to a quadratic equation [ $Y = M * ((x + D + K_d)$   
680  $-\sqrt{((x + D + K_d)^2 - (4 * D * x))}) / (2 * D)$ ] assuming a one site binding model. Data were fit with  
681 PRISM7 software. Unprocessed raw anisotropy values are in the source data file.

682

## 683 **ACKNOWLEDGEMENTS**

684 This study was supported by the National Institutes of Health grant (ES030335 to K.A.B.;  
685 CA218112 to S.A.R.) and the American Cancer Society (129182-RSG-16-043-01-DMC to  
686 K.A.B. and 133947-PF-19-132-01-DMC to S.R.H.).

687

## 688 **REFERENCES**

689 Abreu CM, Prakash R, Romanienko PJ, Roig I, Keeney S, Jasin M (2018) Shu complex SWS1-SWSAP1  
690 promotes early steps in mouse meiotic recombination. *Nat Commun* 9: 3961  
691

692 Admiraal SJ, Eyler DE, Baldwin MR, Brines EM, Lohans CT, Schofield CJ, O'Brien PJ (2019) Expansion of  
693 base excision repair compensates for a lack of DNA repair by oxidative dealkylation in budding yeast. *J*  
694 *Biol Chem* 294: 13629-13637  
695  
696 Arbel M, Liefshitz B, Kupiec M (2020) DNA damage bypass pathways and their effect on mutagenesis in  
697 yeast. *FEMS Microbiol Rev*  
698  
699 Ball LG, Zhang K, Cobb JA, Boone C, Xiao W (2009) The yeast Shu complex couples error-free post-  
700 replication repair to homologous recombination. *Mol Microbiol* 73: 89-102  
701  
702 Beranek DT (1990) Distribution of methyl and ethyl adducts following alkylation with monofunctional  
703 alkylating agents. *Mutat Res* 231: 11-30  
704  
705 Bjoras M, Klungland A, Johansen RF, Seeberg E (1995) Purification and properties of the alkylation repair  
706 DNA glycosylase encoded the *MAG* gene from *Saccharomyces cerevisiae*. *Biochemistry* 34: 4577-4582  
707  
708 Boiteux S, Jinks-Robertson S (2013) DNA repair mechanisms and the bypass of DNA damage in  
709 *Saccharomyces cerevisiae*. *Genetics* 193: 1025-1064  
710  
711 Branzei D, Szakal B (2017) Building up and breaking down: mechanisms controlling recombination during  
712 replication. *Crit Rev Biochem Mol Biol* 52: 381-394  
713  
714 Broomfield S, Chow BL, Xiao W (1998) MMS2, encoding a ubiquitin-conjugating-enzyme-like protein, is a  
715 member of the yeast error-free postreplication repair pathway. *Proc Natl Acad Sci U S A* 95: 5678-83  
716  
717 Cetica V, Genitori L, Giunti L, Sanzo M, Bernini G, Massimino M, Sardi I (2009) Pediatric brain tumors:  
718 mutations of two dioxygenases (hABH2 and hABH3) that directly repair alkylation damage. *J Neurooncol*  
719 94: 195-201  
720  
721 Chan K, Resnick MA, Gordenin DA (2013) The choice of nucleotide inserted opposite abasic sites formed  
722 within chromosomal DNA reveals the polymerase activities participating in translesion DNA synthesis.  
723 *DNA Repair (Amst)* 12: 878-89  
724  
725 Chatterjee N, Walker GC (2017) Mechanisms of DNA damage, repair, and mutagenesis. *Environ Mol*  
726 *Mutagen* 58: 235-263  
727  
728 Choi SY, Jang JH, Kim KR (2011) Analysis of differentially expressed genes in human rectal carcinoma  
729 using suppression subtractive hybridization. *Clin Exp Med* 11: 219-26  
730  
731 Dango S, Mosammaparast N, Sowa ME, Xiong LJ, Wu F, Park K, Rubin M, Gygi S, Harper JW, Shi Y (2011)  
732 DNA unwinding by ASCC3 helicase is coupled to ALKBH3-dependent DNA alkylation repair and cancer  
733 cell proliferation. *Mol Cell* 44: 373-84  
734  
735 Drake JW (1991) A constant rate of spontaneous mutation in DNA-based microbes. *Proc Natl Acad Sci U*  
736 *S A* 88: 7160-4  
737

738 Fedeles BI, Singh V, Delaney JC, Li D, Essigmann JM (2015) The AlkB Family of Fe(II)/alpha-Ketoglutarate-  
739 dependent Dioxygenases: Repairing Nucleic Acid Alkylation Damage and Beyond. *J Biol Chem* 290:  
740 20734-42  
741  
742 Fu D, Calvo JA, Samson LD (2012) Balancing repair and tolerance of DNA damage caused by alkylating  
743 agents. *Nat Rev Cancer* 12: 104-120  
744  
745 Gaines WA, Godin SK, Kabbinavar FF, Rao T, VanDemark AP, Sung P, Bernstein KA (2015) Promotion of  
746 presynaptic filament assembly by the ensemble of *S. cerevisiae* Rad51 paralogues with Rad52. *Nat*  
747 *Commun* 6: 7834  
748  
749 Gao W, Li L, Xu P, Fang J, Xiao S, Chen S (2011) Frequent down-regulation of hABH2 in gastric cancer and  
750 its involvement in growth of cancer cells. *J Gastroenterol Hepatol* 26: 577-84  
751  
752 Geissmann Q (2013) OpenCFU, a new free and open-source software to count cell colonies and other  
753 circular objects. *PLoS ONE* 8: e54072  
754  
755 Gilljam KM, Feyzi E, Aas PA, Sousa MM, Muller R, Vagbo CB, Catterall TC, Liabakk NB, Slupphaug G,  
756 Drablos F, Krokan HE, Otterlei M (2009) Identification of a novel, widespread, and functionally important  
757 PCNA-binding motif. *J Cell Biol* 186: 645-54  
758  
759 Godin S, Wier A, Kabbinavar F, Bratton-Palmer DS, Ghodke H, Van Houten B, VanDemark AP, Bernstein  
760 KA (2013) The Shu complex interacts with Rad51 through the Rad51 paralogues Rad55-Rad57 to  
761 mediate error-free recombination. *Nucleic Acids Res* 41: 4525-4534  
762  
763 Godin SK, Lee AG, Baird JM, Herken BW, Bernstein KA (2016a) Tryptophan biosynthesis is important for  
764 resistance to replicative stress in *Saccharomyces cerevisiae*. *Yeast* 33: 183-9  
765  
766 Godin SK, Meslin C, Kabbinavar F, Bratton-Palmer DS, Hornack C, Mihalevic MJ, Yoshida K, Sullivan M,  
767 Clark NL, Bernstein KA (2015) Evolutionary and Functional Analysis of the Invariant SWIM Domain in the  
768 Conserved Shu2/SWS1 Protein Family from *Saccharomyces cerevisiae* to *Homo sapiens*. *Genetics* 199:  
769 1023-33  
770  
771 Godin SK, Sullivan MR, Bernstein KA (2016b) Novel insights into RAD51 activity and regulation during  
772 homologous recombination and DNA replication. *Biochem Cell Biol* 94: 407-418  
773  
774 Godin SK, Zhang Z, Westmoreland JW, Lee AG, Mihalevic MJ, Yu Z, Sobol RW, Resnick MA, Bernstein KA  
775 (2016c) The Shu complex promotes error-free tolerance of alkylation-induced base-excision repair  
776 products. *Nucleic Acids Res* 30: 8199-8215  
777  
778 Haracska L, Unk I, Johnson RE, Johansson E, Burgers PM, Prakash S, Prakash L (2001) Roles of yeast DNA  
779 polymerases delta and zeta and of Rev1 in the bypass of abasic sites. *Genes Dev* 15: 945-954  
780  
781 Herzberg K, Bashkirov VI, Rolfmeier M, Haghazari E, McDonald WH, Anderson S, Bashkirova EV, Yates  
782 JR, 3rd, Heyer WD (2006) Phosphorylation of Rad55 on serines 2, 8, and 14 is required for efficient  
783 homologous recombination in the recovery of stalled replication forks. *Mol Cell Biol* 26: 8396-8409  
784

- 785 Hoopes JI, Hughes AL, Hobson LA, Cortez LM, Brown AJ, Roberts SA (2017) Avoidance of APOBEC3B-  
786 induced mutation by error-free lesion bypass. *Nucleic Acids Res* 45: 5243-5254  
787
- 788 Huang ME, Rio AG, Nicolas A, Kolodner RD (2003) A genomewide screen in *Saccharomyces cerevisiae* for  
789 genes that suppress the accumulation of mutations. *Proc Natl Acad Sci U S A* 100: 11529-34  
790
- 791 James P, Halladay J, Craig EA (1996) Genomic libraries and a host strain designed for highly efficient two-  
792 hybrid selection in yeast. *Genetics* 144: 1425-36  
793
- 794 Johannessen TC, Prestegarden L, Grudic A, Hegi ME, Tysnes BB, Bjerkvig R (2013) The DNA repair protein  
795 ALKBH2 mediates temozolomide resistance in human glioblastoma cells. *Neuro Oncol* 15: 269-78  
796
- 797 Knijnenburg TA, Wang L, Zimmermann MT, Chambwe N, Gao GF, Cherniack AD, Fan H, Shen H, Way GP,  
798 Greene CS, Liu Y, Akbani R, Feng B, Donehower LA, Miller C, Shen Y, Karimi M, Chen H, Kim P, Jia P et al.  
799 (2018) Genomic and Molecular Landscape of DNA Damage Repair Deficiency across The Cancer Genome  
800 Atlas. *Cell Rep* 23: 239-254 e6  
801
- 802 Knop M, Siegers K, Pereira G, Zachariae W, Winsor K, Schiebel E (1999) Epitope tagging of yeast genes  
803 using a PCR-based strategy: more tags and improved practical routines. *Yeast* 15(10B):963-72  
804
- 805 Koike K, Ueda Y, Hase H, Kitae K, Fusamae Y, Masai S, Inagaki T, Saigo Y, Hirasawa S, Nakajima K, Ohshio  
806 I, Makino Y, Konishi N, Yamamoto H, Tsujikawa K (2012) Anti-tumor effect of AlkB homolog 3 knockdown  
807 in hormone- independent prostate cancer cells. *Curr Cancer Drug Targets* 12: 847-56  
808
- 809 Longtine MS, McKenzie A, 3rd, Demarini DJ, Shah NG, Wach A, Brachat A, Philippsen P, Pringle JR (1998)  
810 Additional modules for versatile and economical PCR-based gene deletion and modification in  
811 *Saccharomyces cerevisiae*. *Yeast* 14: 953-61  
812
- 813 Mao P, Brown AJ, Malc EP, Mieczkowski PA, Smerdon MJ, Roberts SA, Wyrick JJ (2017) Genome-wide  
814 maps of alkylation damage, repair, and mutagenesis in yeast reveal mechanisms of mutational  
815 heterogeneity. *Genome Res* 27: 1674-1684  
816
- 817 Martino J, Bernstein KA (2016) The Shu complex is a conserved regulator of homologous recombination.  
818 *FEMS Yeast Res* 16  
819
- 820 Martino J, Brunette GJ, Barroso-Gonzalez J, Moiseeva TN, Smith CM, Bakkenist CJ, O'Sullivan RJ,  
821 Bernstein KA (2019) The human Shu complex functions with PDS5B and SPIDR to promote homologous  
822 recombination. *Nucleic Acids Res* 47: 10151-10165  
823
- 824 Monsen VT, Sundheim O, Aas PA, Westbye MP, Sousa MM, Slupphaug G, Krokan HE (2010) Divergent ss-  
825 hairpins determine double-strand versus single-strand substrate recognition of human AlkB-homologues  
826 2 and 3. *Nucleic Acids Res* 38: 6447-55  
827
- 828 Nieminiusz J, Mielecki D, Sikora A, Wrzesinski M, Chojnacka A, Krwawicz J, Janion C, Grzesiuk E (2009)  
829 Mutagenic potency of MMS-induced 1meA/3meC lesions in *E. coli*. *Environ Mol Mutagen* 50: 791-9  
830
- 831 Northam MR, Robinson HA, Kochenova OV, Shcherbakova PV (2010) Participation of DNA polymerase  $\zeta$   
832 in replication of undamaged DNA in *Saccharomyces cerevisiae*. *Genetics* 184: 27-42

- 833 Pataillot-Meakin T, Pillay N, Beck S (2016) 3-methylcytosine in cancer: an underappreciated methyl  
834 lesion? *Epigenomics* 8: 451-4
- 835
- 836 Roberts SA, Sterling J, Thompson C, Harris S, Mav D, Shah R, Klimczak LJ, Kryukov GV, Malc E,  
837 Mieczkowski PA, Resnick MA, Gordenin DA (2012) Clustered mutations in yeast and in human cancers  
838 can arise from damaged long single-strand DNA regions. *Mol Cell* 46: 424-35
- 839
- 840 Rosenbaum JC, Bonilla B, Hengel SR, Mertz TM, Herken BW, Kazemier HG, Pressimone CA, Ratterman  
841 TC, MacNary E, De Magis A, Kwon Y, Godin SK, Van Houten B, Normolle DP, Sung P, Das SR, Paeschke K,  
842 Roberts SA, VanDemark AP, Bernstein KA (2019) The Rad51 paralogs facilitate a novel DNA strand  
843 specific damage tolerance pathway. *Nat Commun* 10: 3515
- 844
- 845 Rosic S, Amouroux R, Requena CE, Gomes A, Emperle M, Beltran T, Rane JK, Linnett S, Selkirk ME,  
846 Schiffer PH, Bancroft AJ, Grecis RK, Jeltsch A, Hajkova P, Sarkies P (2018) Evolutionary analysis indicates  
847 that DNA alkylation damage is a byproduct of cytosine DNA methyltransferase activity. *Nat Genet* 50:  
848 452-459
- 849
- 850 Saini N, Gordenin DA (2020) Hypermutation in single-stranded DNA. *DNA Repair (Amst)* 91-92: 102868
- 851 Saini N, Sterling JF, Sakofsky CJ, Giacobone CK, Klimczak LJ, Burkholder AB, Malc EP, Mieczkowski PA,  
852 Gordenin DA (2020) Mutation signatures specific to DNA alkylating agents in yeast and cancers. *Nucleic  
853 Acids Res* 48: 3692-3707
- 854
- 855 Sakamoto AN, Stone JE, Kissling GE, McCulloch SD, Pavlov YI, Kunkel TA (2007) Mutator alleles of yeast  
856 DNA polymerase  $\zeta$ . *DNA Repair* 6: 1829-38.
- 857
- 858 Sakofsky CJ, Roberts SA, Malc E, Mieczkowski PA, Resnick MA, Gordenin DA, Malkova A (2014) Break-  
859 induced replication is a source of mutation clusters underlying kataegis. *Cell Rep* 7: 1640-1648
- 860 Sedgwick B, Bates PA, Paik J, Jacobs SC, Lindahl T (2007) Repair of alkylated DNA: recent advances. *DNA  
861 Repair (Amst)* 6: 429-42
- 862
- 863 Sherman F, Fink GR, Hicks JB (1986) *Methods in Yeast Genetics*. Cold Spring Harbor Laboratory Press,  
864 Cold Spring Harbor, NY
- 865
- 866 Shivange G, Kodipelli N, Monisha M, Anindya R (2014) A role for *Saccharomyces cerevisiae* Tpa1 protein  
867 in direct alkylation repair. *J Biol Chem* 289: 35939-52
- 868
- 869 Shor E, Weinstein J, Rothstein R (2005) A genetic screen for top3 suppressors in *Saccharomyces  
870 cerevisiae* identifies *SHU1*, *SHU2*, *PSY3* and *CSM2*: four genes involved in error-free DNA repair. *Genetics*  
871 169: 1275-89
- 872
- 873 Shrivastav N, Li D, Essigmann JM (2010) Chemical biology of mutagenesis and DNA repair: cellular  
874 responses to DNA alkylation. *Carcinogenesis* 31: 59-70
- 875
- 876 Sikora A, Mielecki D, Chojnacka A, Nieminuszczy J, Wrzesinski M, Grzesiuk E (2010) Lethal and mutagenic  
877 properties of MMS-generated DNA lesions in *Escherichia coli* cells deficient in BER and AlkB-directed  
878 DNA repair. *Mutagenesis* 25: 139-47
- 879

880 Sobol RW, Kartalou M, Almeida KH, Joyce DF, Engelward BP, Horton JK, Prasad R, Samson LD, Wilson SH  
881 (2003) Base excision repair intermediates induce p53-independent cytotoxic and genotoxic responses. *J*  
882 *Biol Chem* 278: 39951-39959  
883  
884 Stefansson OA, Hermanowicz S, van der Horst J, Hilmarsdottir H, Staszczak Z, Jonasson JG, Tryggvadottir  
885 L, Gudjonsson T, Sigurdsson S (2017) CpG promoter methylation of the ALKBH3 alkylation repair gene in  
886 breast cancer. *BMC Cancer* 17: 469  
887  
888 Swanson RL, Morey NJ, Doetsch PW, Jinks-Robertson S (1999) Overlapping specificities of base excision  
889 repair, nucleotide excision repair, recombination, and translesion synthesis pathways for DNA base  
890 damage in *Saccharomyces cerevisiae*. *Mol Cell Biol* 19: 2929-2935  
891  
892 Tasaki M, Shimada K, Kimura H, Tsujikawa K, Konishi N (2011) ALKBH3, a human AlkB homologue,  
893 contributes to cell survival in human non-small-cell lung cancer. *Br J Cancer* 104: 700-6  
894  
895 Thomas BJ, Rothstein R (1989) Elevated recombination rates in transcriptionally active DNA. *Cell* 56: 619-  
896 30  
897  
898 Ulrich HD (2007) Conservation of DNA damage tolerance pathways from yeast to humans. *Biochem Soc*  
899 *Trans* 35: 1334-7  
900  
901 Wang P, Wu J, Ma S, Zhang L, Yao J, Hoadley KA, Wilkerson MD, Perou CM, Guan KL, Ye D, Xiong Y (2015)  
902 Oncometabolite D-2-Hydroxyglutarate Inhibits ALKBH DNA Repair Enzymes and Sensitizes IDH Mutant  
903 Cells to Alkylating Agents. *Cell Rep* 13: 2353-2361  
904  
905 Wu SS, Xu W, Liu S, Chen B, Wang XL, Wang Y, Liu SF, Wu JQ (2011) Down-regulation of ALKBH2  
906 increases cisplatin sensitivity in H1299 lung cancer cells. *Acta Pharmacol Sin* 32: 393-8  
907  
908 Wyatt MD, Allan JM, Lau AY, Ellenberger TE, Samson LD (1999) 3-methyladenine DNA glycosylases:  
909 structure, function, and biological importance. *Bioessays* 21: 668-76  
910  
911 Wyatt MD, Pittman DL (2006) Methylating agents and DNA repair responses: Methylated bases and  
912 sources of strand breaks. *Chem Res Toxicol* 19: 1580-94  
913  
914 Xu X, Ball L, Chen W, Tian X, Lambrecht A, Hanna M, Xiao W (2013) The yeast Shu complex utilizes  
915 homologous recombination machinery for error-free lesion bypass via physical interaction with a Rad51  
916 paralogue. *PLoS ONE* 8: e81371  
917  
918 Xu X, Blackwell S, Lin A, Li F, Qin Z, Xiao W (2015) Error-free DNA-damage tolerance in *Saccharomyces*  
919 *cerevisiae*. *Mutat Res Rev Mutat Res* 764: 43-50  
920  
921 Yang Y, Gordenin DA, Resnick MA (2010) A single-strand specific lesion drives MMS-induced hyper-  
922 mutability at a double-strand break in yeast. *DNA Repair (Amst)* 9: 914-21  
923  
924 Yi C, He C (2013) DNA repair by reversal of DNA damage. *Cold Spring Harb Perspect Biol* 5: a012575  
925 Zhao X, Muller EG, Rothstein R (1998) A suppressor of two essential checkpoint genes identifies a novel  
926 protein that negatively affects dNTP pools. *Mol Cell* 2: 329-40  
927



928 Zheng L, Baumann U, Reymond JL (2004) An efficient one-step site-directed and site-saturation  
929 mutagenesis protocol. *Nucleic Acids Res* 32: e115

930

## 931 SUPPLEMENTAL FIGURES

**Figure S1**

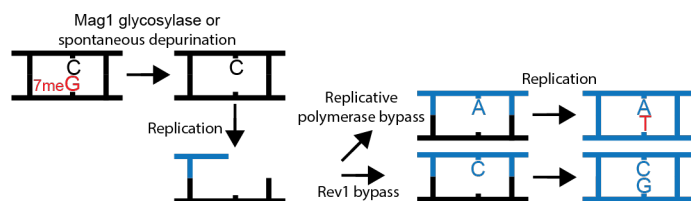

932

### 933 Supplemental Figure 1. Schematic of How 7meG Derived AP Sites Lead to G to T as the Main 934 Substitution Pattern

935 7meG can be converted to AP sites by spontaneous hydrolysis or the glycosylase activity of Mag1. AP  
936 may be bypassed by the TLS activity of Rev1 which in this case is error-free. Alternatively, lesion bypass  
937 by the replicative polymerase, which predominantly incorporates A across AP sites, would result in a G to  
938 T mutation pattern.

939

940

941

942

943

944

945

946

947

948

949

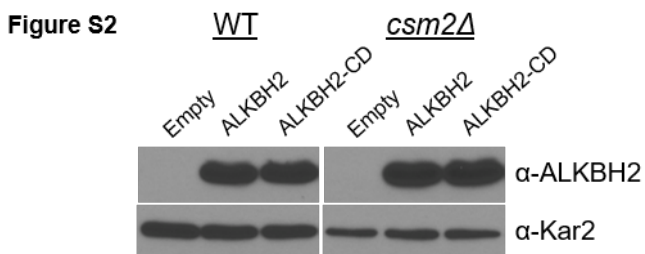

950  
951  
952  
953  
954  
955  
956  
957  
958  
959  
960  
961  
962  
963  
964  
965  
966  
967  
968  
969  
970  
971  
972  
973  
974  
975

**Supplemental Figure 2. Protein Blot Analysis of ALKBH2 and ALKBH2-CD Expression in WT and *csm2Δ* Cells.**

WT and *csm2Δ* strains expressing an empty plasmid (pAG416GPD-*ccdB*) or a plasmid (pAG416GPD-*ccdB*) expressing either ALKBH2 or ALKBH2-CD were analyzed for ALKBH2 protein levels. Protein extracts from equal cell numbers were analyzed by western blot for ALKBH2 ( $\alpha$ -ALKBH2) or Kar2 ( $\alpha$ -Kar2) expression as a loading control.

Figure S3

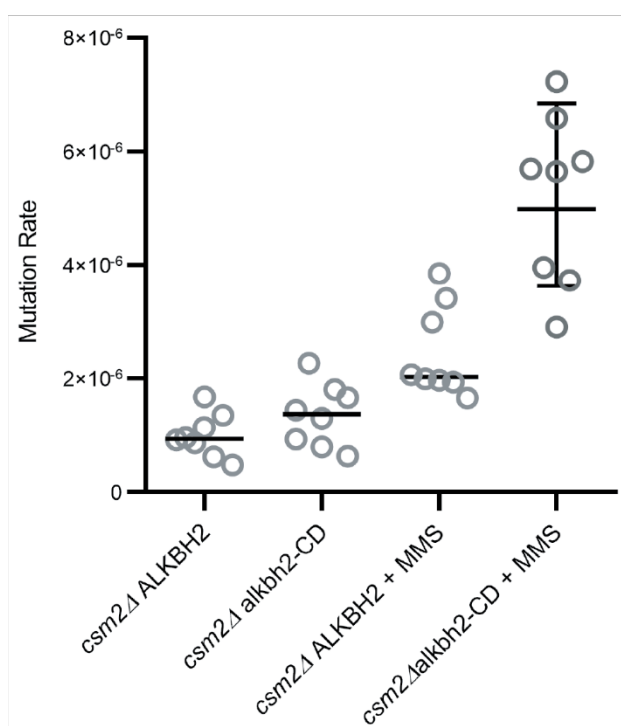

976

977 **Supplemental Figure 3. Expression of a *ALKBH2* Catalytic Dead Mutant Does Not Rescue the**  
978 **Mutagenesis Observed in MMS Exposed *csm2Δ* Cells**

979 *csm2Δ* cells expressing *ALKBH2-CD* exhibit an increased MMS-induced mutation rate. Spontaneous and  
980 MMS-induced mutation rates at the *CAN1* locus were measured in *csm2Δ* cells transformed with either a  
981 plasmid expressing *ALKBH2* or *ALKBH2-CD*. Each measurement (dots) and the median value of 8  
982 experiments (horizontal bar) were plotted. The *p*-values between *ALKBH2* and *ALKBH2-CD* expressing  
983 cells were calculated using a Mann-Whitney Ranked sum test and were  $p > 0.05$  and  $p < 0.03$  for the  
984 untreated and MMS treated samples, respectively.

985

986

987

988

989

990

991

Figure S4

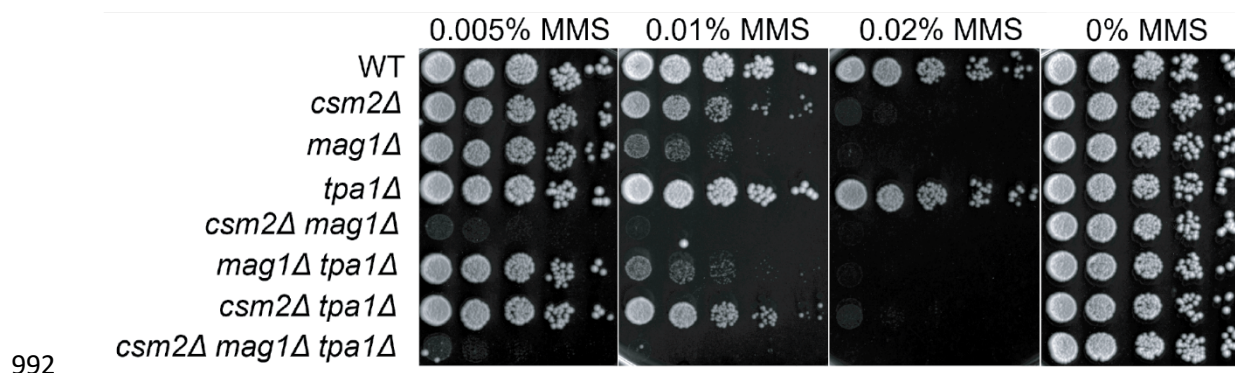

993 **Supplemental Figure 4. *TPA1* Does Not Genetically Interact with *CSM2* or *MAG1* for MMS**  
994 **Damage**

995 Five-fold serial dilution of cells with the indicated genotypes were transformed onto rich YPD medium or  
996 rich YPD medium containing the indicated MMS concentration were incubated for two days at 30°C prior  
997 to being photographed.
